# Supplementary material for: Transcriptomic Analysis for Different Sex Types of Ricinus communis L. during Development from Apical Buds to Inflorescences by Digital Gene Expression Profiling
Source: Front Plant Sci. 2016 Feb 12;6:1208. doi: 10.3389/fpls.2015.01208 (PMC4751274; doi:10.3389/fpls.2015.01208)
Supplement: Supplementary file 3 [file DataSheet3.XLSX]

## Sheet: Sheet1
DGE results for ABML1, ABPL1, ABML2, ABPL2, RML and RPL
ABML1																				ABPL1																				ABML2
1 Reference Tag Database																				1 Reference Tag Database																				1 Reference Tag Database
Reference Gene	120799																			Reference Gene	120799																			Reference Gene	120799
Genes With CATG Site	108757	0.9003																		Genes With CATG Site	108757	0.9003																		Genes With CATG Site	108757	0.9003
# of Total Reference Tags	1431094																			# of Total Reference Tags	1431094																			# of Total Reference Tags	1431094
# of Unambiguous Tags	317220	0.2217																		# of Unambiguous Tags	317220	0.2217																		# of Unambiguous Tags	317220	0.2217
# of Ambiguous tags	1113874																			# of Ambiguous tags	1113874																			# of Ambiguous tags	1113874
Note: We take all CATG*** tags in a gene, not only the 3' end one, as its reference tags.																				Note: We take all CATG*** tags in a gene, not only the 3' end one, as its reference tags.																				Note: We take all CATG*** tags in a gene, not only the 3' end one, as its reference tags.
2 Solexa Tag Library																				2 Solexa Tag Library																				2 Solexa Tag Library
	ABML1-1				ABML1-2				ABML1-3												ABPL1-1				ABPL1-2				ABPL1-3												ABML2-1				ABML2-2				ABML2-3
	Distinct Tag		Total Tag Number		Distinct Tag		Total Tag Number		Distinct Tag		Total Tag Number										Distinct Tag		Total Tag Number		Distinct Tag		Total Tag Number		Distinct Tag		Total Tag Number										Distinct Tag		Total Tag Number		Distinct Tag		Total Tag Number		Distinct Tag
Raw Data	369308	1	5779068	1	377484	1	6162928	1	369157	1	5817391	1								Raw Data	381120	1	6026477	1	331708	1	5845388	1	410919	1	5793267	1								Raw Data	401207	1	6036152	1	377932	1	5900699	1	395614
Tags Containing N	5514	0.0149	6677	0.0012	5924	0.0157	7209	0.0012	5617	0.0152	6798	0.0012								Tags Containing N	5797	0.0152	6922	0.0011	5437	0.0164	6742	0.0012	2865	0.007	3232	0.0006								Tags Containing N	5992	0.0149	7037	0.0012	5687	0.015	6967	0.0012	5769
Adaptors	64	0.0002	65	0	59	0.0002	60	0	55	0.0001	57	0								Adaptors	111	0.0003	117	0	59	0.0002	60	0	31	0.0001	31	0								Adaptors	124	0.0003	125	0	73	0.0002	73	0	40
Tag CopyNum <2	215609	0.5838	215609	0.0373	217435	0.576	217435	0.0353	212956	0.5769	212956	0.0366								Tag CopyNum <2	219068	0.5748	219068	0.0364	192077	0.5791	192077	0.0329	252723	0.615	252723	0.0436								Tag CopyNum <2	238243	0.5938	238243	0.0395	224659	0.5944	224659	0.0381	229046
Clean Tag	148121	0.4011	5556717	0.9615	154066	0.4081	5938224	0.9635	150529	0.4078	5597580	0.9622								Clean Tag	156144	0.4097	5800370	0.9625	134135	0.4044	5646509	0.966	155300	0.3779	5537281	0.9558								Clean Tag	156848	0.3909	5790747	0.9593	147513	0.3903	5669000	0.9607	160759
CopyNum >=2	148121	1	5556717	1	154066	1	5938224	1	150529	1	5597580	1								CopyNum >=2	156144	1	5800370	1	134135	1	5646509	1	155300	1	5537281	1								CopyNum >=2	156848	1	5790747	1	147513	1	5669000	1	160759
CopyNum >5	63284	0.4272	5316516	0.9568	66140	0.4293	5689230	0.9581	63995	0.4251	5352276	0.9562								CopyNum >5	67351	0.4313	5548916	0.9566	57714	0.4303	5430546	0.9618	61948	0.3989	5276315	0.9529								CopyNum >5	65337	0.4166	5532360	0.9554	60750	0.4118	5423878	0.9568	66939
CopyNum >10	42684	0.2882	5160214	0.9286	44632	0.2897	5526227	0.9306	43087	0.2862	5193629	0.9278								CopyNum >10	45221	0.2896	5380919	0.9277	38818	0.2894	5287118	0.9364	41252	0.2656	5119797	0.9246								CopyNum >10	43768	0.279	5369244	0.9272	40644	0.2755	5271578	0.9299	44350
CopyNum >20	28409	0.1918	4951056	0.891	29634	0.1923	5306952	0.8937	28649	0.1903	4981925	0.89								CopyNum >20	29755	0.1906	5154449	0.8886	25845	0.1927	5097914	0.9028	27429	0.1766	4918112	0.8882								CopyNum >20	29406	0.1875	5159388	0.891	27328	0.1853	5076941	0.8956	29047
CopyNum >50	15549	0.105	4536152	0.8163	16442	0.1067	4881426	0.822	15819	0.1051	4567532	0.816								CopyNum >50	16227	0.1039	4720289	0.8138	14462	0.1078	4734076	0.8384	15386	0.0991	4529565	0.818								CopyNum >50	16404	0.1046	4740318	0.8186	15400	0.1044	4693849	0.828	16141
CopyNum >100	8950	0.0604	4065836	0.7317	9443	0.0613	4382699	0.738	9112	0.0605	4089689	0.7306								CopyNum >100	9530	0.061	4243530	0.7316	8682	0.0647	4320879	0.7652	9119	0.0587	4084279	0.7376								CopyNum >100	9659	0.0616	4262066	0.736	9178	0.0622	4250527	0.7498	9371
3 Tag Mapping																				3 Tag Mapping																				3 Tag Mapping
	ABML1-1						ABML1-2						ABML1-3								ABPL1-1						ABPL1-2						ABPL1-3								ABML2-1						ABML2-2
	Distinct Tag		Total Tag Number		Number of Gene		Distinct Tag		Total Tag Number		Number of Gene		Distinct Tag		Total Tag Number		Number of Gene				Distinct Tag		Total Tag Number		Number of Gene		Distinct Tag		Total Tag Number		Number of Gene		Distinct Tag		Total Tag Number		Number of Gene				Distinct Tag		Total Tag Number		Number of Gene		Distinct Tag		Total Tag Number
Clean Tag	148121		5556717		120799		154066		5938224		120799		150529		5597580		120799			Clean Tag	156144		5800370		120799		134135		5646509		120799		155300		5537281		120799			Clean Tag	156848		5790747		120799		147513		5669000
Perfect Match(Sense)																				Perfect Match(Sense)																				Perfect Match(Sense)
1 tag->1 gene	4843	0.0327	105605	0.019	3658	0.0303	5178	0.0336	117104	0.0197	3850	0.0319	5532	0.0368	118688	0.0212	4045	0.0335		1 tag->1 gene	5149	0.033	115549	0.0199	3755	0.0311	4684	0.0349	110750	0.0196	3472	0.0287	4549	0.0293	97909	0.0177	3365	0.0279		1 tag->1 gene	5373	0.0343	104816	0.0181	3832	0.0317	5422	0.0368	102923
1 tag->n gene	69148	0.4668	3633449	0.6539	47911	0.3966	72738	0.4721	3964594	0.6676	47913	0.3966	73281	0.4868	3825111	0.6834	48961	0.4053		1 tag->n gene	70813	0.4535	3662083	0.6314	37059	0.3068	63580	0.474	3802859	0.6735	34946	0.2893	63974	0.4119	3545243	0.6402	35528	0.2941		1 tag->n gene	69818	0.4451	3642502	0.629	38159	0.3159	69250	0.4695	3805290
1bp MisMatch(Sense)																				1bp MisMatch(Sense)																				1bp MisMatch(Sense)
1 tag->1 gene	1062	0.0072	35511	0.0064	350	0.0029	1077	0.007	37553	0.0063	372	0.0031	968	0.0064	32137	0.0057	360	0.003		1 tag->1 gene	1194	0.0076	39549	0.0068	371	0.0031	858	0.0064	30529	0.0054	317	0.0026	1190	0.0077	32782	0.0059	399	0.0033		1 tag->1 gene	1189	0.0076	37759	0.0065	408	0.0034	927	0.0063	27504
1 tag->n gene	17167	0.1159	189873	0.0342	8170	0.0676	17766	0.1153	189321	0.0319	8496	0.0703	17214	0.1144	161655	0.0289	8172	0.0676		1 tag->n gene	18091	0.1159	231015	0.0398	8648	0.0716	15902	0.1186	153301	0.0271	7625	0.0631	26605	0.1713	208614	0.0377	8992	0.0744		1 tag->n gene	19397	0.1237	224679	0.0388	8946	0.0741	18404	0.1248	160964
Perfect Match(AntiSense)																				Perfect Match(AntiSense)																				Perfect Match(AntiSense)
1 tag->1 gene	1167	0.0079	16522	0.003	1078	0.0089	1287	0.0084	18538	0.0031	1187	0.0098	1177	0.0078	16777	0.003	1084	0.009		1 tag->1 gene	1342	0.0086	18840	0.0032	1222	0.0101	1204	0.009	19082	0.0034	1114	0.0092	1149	0.0074	14671	0.0026	1067	0.0088		1 tag->1 gene	1149	0.0073	15662	0.0027	1066	0.0088	1142	0.0077	15406
1 tag->n gene	33159	0.2239	1168207	0.2102	13521	0.1119	34822	0.226	1226594	0.2066	13893	0.115	33970	0.2257	1140139	0.2037	13684	0.1133		1 tag->n gene	35806	0.2293	1277373	0.2202	14104	0.1168	33310	0.2483	1330568	0.2356	13837	0.1145	33759	0.2174	1314353	0.2374	13626	0.1128		1 tag->n gene	34387	0.2192	1272905	0.2198	13532	0.112	33854	0.2295	1294964
1bp MisMatch(AntiSense)																				1bp MisMatch(AntiSense)																				1bp MisMatch(AntiSense)
1 tag->1 gene	242	0.0016	3177	0.0006	32	0.0003	258	0.0017	3082	0.0005	36	0.0003	203	0.0013	2141	0.0004	33	0.0003		1 tag->1 gene	297	0.0019	4640	0.0008	42	0.0003	120	0.0009	688	0.0001	35	0.0003	232	0.0015	1925	0.0003	39	0.0003		1 tag->1 gene	291	0.0019	4585	0.0008	26	0.0002	171	0.0012	1275
1 tag->n gene	5334	0.036	64021	0.0115	2310	0.0191	5168	0.0335	59297	0.01	2307	0.0191	4780	0.0318	50392	0.009	2238	0.0185		1 tag->n gene	5925	0.0379	73263	0.0126	2539	0.021	4707	0.0351	39112	0.0069	2046	0.0169	9184	0.0591	66725	0.0121	2518	0.0208		1 tag->n gene	6423	0.041	84429	0.0146	2473	0.0205	5488	0.0372	50758
All Tag Mapping to Sense Gene	92220	0.6226	3964438	0.7134	49235	0.4076	96759	0.628	4308572	0.7256	49177	0.4071	96995	0.6444	4137591	0.7392	50237	0.4159		All Tag Mapping to Sense Gene	95247	0.61	4048196	0.6979	38561	0.3192	85024	0.6339	4097439	0.7257	36244	0.3	96318	0.6202	3884548	0.7015	37005	0.3063		All Tag Mapping to Sense Gene	95777	0.6106	4009756	0.6924	39561	0.3275	94003	0.6373	4096681
Unambiguous Tag Mapping to Sense Gene	5905	0.0399	141116	0.0254	3795	0.0314	6255	0.0406	154657	0.026	3987	0.033	6500	0.0432	150825	0.0269	4174	0.0346		Unambiguous Tag Mapping to Sense Gene	6343	0.0406	155098	0.0267	3880	0.0321	5542	0.0413	141279	0.025	3583	0.0297	5739	0.037	130691	0.0236	3512	0.0291		Unambiguous Tag Mapping to Sense Gene	6562	0.0418	142575	0.0246	3975	0.0329	6349	0.043	130427
All Tag Mapping to Anti-Sense Gene	39902	0.2694	1251927	0.2253	14449	0.1196	41535	0.2696	1307511	0.2202	14851	0.1229	40130	0.2666	1209449	0.2161	14576	0.1207		All Tag Mapping to Anti-Sense Gene	43370	0.2778	1374116	0.2369	15085	0.1249	39341	0.2933	1389450	0.2461	14633	0.1211	44324	0.2854	1397674	0.2524	14475	0.1198		All Tag Mapping to Anti-Sense Gene	42250	0.2694	1377581	0.2379	14455	0.1197	40655	0.2756	1362403
Unambiguous Tag Mapping to Anti-Sense Gene	1409	0.0095	19699	0.0035	1092	0.009	1545	0.01	21620	0.0036	1203	0.01	1380	0.0092	18918	0.0034	1096	0.0091		Unambiguous Tag Mapping to Anti-Sense Gene	1639	0.0105	23480	0.004	1237	0.0102	1324	0.0099	19770	0.0035	1123	0.0093	1381	0.0089	16596	0.003	1078	0.0089		Unambiguous Tag Mapping to Anti-Sense Gene	1440	0.0092	20247	0.0035	1078	0.0089	1313	0.0089	16681
All Tag Mapping to Gene (Sense & Anti-Senese)	132122	0.892	5216365	0.9387	50461	0.4177	138294	0.8976	5616083	0.9458	50322	0.4166	137125	0.911	5347040	0.9552	51383	0.4254		All Tag Mapping to Gene (Sense & Anti-Senese)	138617	0.8878	5422312	0.9348	40050	0.3315	124365	0.9272	5486889	0.9717	37917	0.3139	140642	0.9056	5282222	0.9539	38634	0.3198		All Tag Mapping to Gene (Sense & Anti-Senese)	138027	0.88	5387337	0.9303	40833	0.338	134658	0.9129	5459084
Unambiguous Tag Mapping to Gene (Sense & Anti-Sense)	7314	0.0494	160815	0.0289	4655	0.0385	7800	0.0506	176277	0.0297	4922	0.0407	7880	0.0523	169743	0.0303	5025	0.0416		Unambiguous Tag Mapping to Gene (Sense & Anti-Sense)	7982	0.0511	178578	0.0308	4839	0.0401	6866	0.0512	161049	0.0285	4497	0.0372	7120	0.0458	147287	0.0266	4409	0.0365		Unambiguous Tag Mapping to Gene (Sense & Anti-Sense)	8002	0.051	162822	0.0281	4828	0.04	7662	0.0519	147108
Mapping to Genome	ABML1-1				ABML1-2				ABML1-3											Mapping to Genome	ABPL1-1				ABPL1-2				ABPL1-3											Mapping to Genome	ABML2-1				ABML2-2				ABML2-3
Perfect Match	Distinct Tag		Total Tag Number		Distinct Tag		Total Tag Number		Distinct Tag		Total Tag Number									Perfect Match	Distinct Tag		Total Tag Number		Distinct Tag		Total Tag Number		Distinct Tag		Total Tag Number									Perfect Match	Distinct Tag		Total Tag Number		Distinct Tag		Total Tag Number		Distinct Tag
1 tag->1 position	4	0	44	0	4	0	49	0	4	0	54	0								1 tag->1 position	3	0	27	0	3	0	42	0	3	0	28	0								1 tag->1 position	4	0	64	0	4	0	58	0	5
1 tag->n position	0	0	0	0	0	0	0	0	0	0	0	0								1 tag->n position	0	0	0	0	0	0	0	0	0	0	0	0								1 tag->n position	0	0	0	0	0	0	0	0	0
1bp Mismatch																				1bp Mismatch																				1bp Mismatch
1 tag->1 position	1420	0.0096	31810	0.0057	1513	0.0098	31049	0.0052	1289	0.0086	25600	0.0046								1 tag->1 position	1692	0.0108	36767	0.0063	1477	0.011	21639	0.0038	1390	0.009	29207	0.0053								1 tag->1 position	1771	0.0113	37973	0.0066	1418	0.0096	26390	0.0047	2157
1 tag->n position	83	0.0006	2262	0.0004	84	0.0005	2085	0.0004	80	0.0005	1481	0.0003								1 tag->n position	108	0.0007	3169	0.0005	63	0.0005	481	0.0001	83	0.0005	1232	0.0002								1 tag->n position	102	0.0007	3186	0.0006	69	0.0005	1015	0.0002	108
Unknown Tag	14492	0.0978	306236	0.0551	14171	0.092	288958	0.0487	12031	0.0799	223405	0.0399								Unknown Tag	15724	0.1007	338095	0.0583	8227	0.0613	137458	0.0243	13182	0.0849	224592	0.0406								Unknown Tag	16944	0.108	362187	0.0625	11364	0.077	182453	0.0322	13121
Copy Num >=2	14492	1	306236	1	14171	1	288958	1	12031	1	223405	1								Copy Num >=2	15724	1	338095	1	8227	1	137458	1	13182	1	224592	1								Copy Num >=2	16944	1	362187	1	11364	1	182453	1	13121
Copy Num >5	5116	0.353	280733	0.9167	4797	0.3385	263680	0.9125	4019	0.3341	201455	0.9017								Copy Num >5	5466	0.3476	310194	0.9175	2167	0.2634	121518	0.884	4090	0.3103	199893	0.89								Copy Num >5	5886	0.3474	332132	0.917	3480	0.3062	161254	0.8838	3907
Copy Num >10	3184	0.2197	266132	0.869	2991	0.2111	250066	0.8654	2511	0.2087	190019	0.8506								Copy Num >10	3416	0.2172	294620	0.8714	1280	0.1556	114835	0.8354	2476	0.1878	187728	0.8359								Copy Num >10	3719	0.2195	315914	0.8722	2065	0.1817	150610	0.8255	2348
Copy Num >20	1876	0.1295	247038	0.8067	1767	0.1247	232278	0.8038	1443	0.1199	174335	0.7804								Copy Num >20	2047	0.1302	274672	0.8124	777	0.0944	107521	0.7822	1448	0.1098	172703	0.769								Copy Num >20	2265	0.1337	294745	0.8138	1214	0.1068	138129	0.7571	1361
Copy Num >50	887	0.0612	215259	0.7029	812	0.0573	201788	0.6983	669	0.0556	149743	0.6703								Copy Num >50	940	0.0598	239803	0.7093	342	0.0416	93763	0.6821	667	0.0506	148199	0.6599								Copy Num >50	1079	0.0637	257134	0.7099	574	0.0505	117849	0.6459	646
Copy Num >100	476	0.0328	186477	0.6089	417	0.0294	173692	0.6011	348	0.0289	127191	0.5693								Copy Num >100	499	0.0317	208791	0.6176	200	0.0243	83578	0.608	354	0.0269	126027	0.5611								Copy Num >100	572	0.0338	221480	0.6115	309	0.0272	99009	0.5427	347
[truncated: 66 more columns]
