# Supplementary material for: Transcriptomic Analysis for Different Sex Types of Ricinus communis L. during Development from Apical Buds to Inflorescences by Digital Gene Expression Profiling
Source: Front Plant Sci. 2016 Feb 12;6:1208. doi: 10.3389/fpls.2015.01208 (PMC4751274; doi:10.3389/fpls.2015.01208)
Supplement: Supplementary file 11 [file DataSheet11.XLSX]

## Sheet: 聚类分支的基因名称
Cluster A					Cluster B					Cluster C					Cluster D					Cluster E					Cluster F					Cluster G					Cluster H					Cluster I
Gene	ABML1-vs-ABPL1	ABML2-vs-ABPL2	RML-vs-RPL		Gene	ABML1-vs-ABPL1	ABML2-vs-ABPL2	RML-vs-RPL		Gene	ABML1-vs-ABPL1	ABML2-vs-ABPL2	RML-vs-RPL		Gene	ABML1-vs-ABPL1	ABML2-vs-ABPL2	RML-vs-RPL		Gene	ABML1-vs-ABPL1	ABML2-vs-ABPL2	RML-vs-RPL		Gene	ABML1-vs-ABPL1	ABML2-vs-ABPL2	RML-vs-RPL		Gene	ABML1-vs-ABPL1	ABML2-vs-ABPL2	RML-vs-RPL		Gene	ABML1-vs-ABPL1	ABML2-vs-ABPL2	RML-vs-RPL		Gene	ABML1-vs-ABPL1	ABML2-vs-ABPL2	RML-vs-RPL
gi|255573875|ref|XM_002527811.1|	-8.04621	-3.53916	-8.53916		29908.m006221	-6.43185	1.40263	1.11548		gi|255536722|ref|XM_002509382.1|	-1.78427	1.57135	-6.73245		30079.m000451	1.83261	1.70941	2.1841		30190.m010964	1.32193	5.40372	-1.24393		gi|255572316|ref|XM_002527051.1|	-2.16398	7.07325	1.69834		29647.m002007	3.62449	-6.11548	-3.58496		30040.m000266	5.12928	-1.19502	1.09717		gi|255542393|ref|XM_002512214.1|	-4.14296	-2.28129	1.70941
29737.m001207	-2.152	-1.51326	-4.14296		29682.m000591	-4.92283	1.16534	1.89907		30131.m007059	-1.28951	2.26628	-4.58496		29588.m000856	1.2115	1.03279	1.86577		30128.m008731	5.1565	5.35755	-1.27302		gi|255572532|ref|XM_002527155.1|	-1.17985	8.06609	5.69116		gi|255557557|ref|XM_002519763.1|	1.57586	-5.70044	-3.62449		30149.m000231	4.54432	-1	2.3961		gi|255537412|ref|XM_002509727.1|	-5.14296	-1.09311	2.0282
gi|255540586|ref|XM_002511312.1|	-1.51847	-1.49099	-4.85798		29726.m003890	-4.56478	1.53201	1.8606		gi|255571518|ref|XM_002526661.1|	-1.26628	2.51165	-4.58496		29761.m000412	1.30581	1.15612	1.28951		30040.m000265	4.1964	4.58496	-1.30581		29842.m003573	-1.26628	4.56478	5.99247		30068.m002654	6.02237	-3.62449	-4.58496		28301.m000019	5.16993	-2.67094	4.14296		gi|255572072|ref|XM_002526931.1|	-5.38082	-1.47999	1.11704
gi|255541313|ref|XM_002511675.1|	-1.22781	-1.28951	-4.14296		29759.m000276	-4.56478	1.60842	2.09311		28842.m000937	-2.65025	2.14027	-4.54432		29986.m001638	1.15403	1.67974	1.49354		29986.m001605	3.58496	3.58496	-1.54432		30204.m001741	-1.19931	3.58496	4.8413		29610.m000411	4.89077	-5.53398	-5.1565		29726.m004103	5.36923	-1.77259	4.54432		29794.m003430	-5.14296	-1.54432	5.11548
29950.m001177	-3.66296	-1.20282	-3.66296		29794.m003439	-5.14296	1.02046	1.1375		27894.m000798	-2.3178	1.02066	-4.56478		gi|255539009|ref|XM_002510524.1|	1.64712	1.74664	1.09686		30054.m000808	3.62449	4.1964	-1.42183		29948.m000693	-1.94902	2.76671	3.58496		29666.m001488	4.58496	-4.56478	-4.16993		29653.m000298	3.58496	-1.19502	3.66296		30169.m006362	-3.58496	-1.11548	3.58496
gi|255555566|ref|XM_002518774.1|	-5.1565	-1.07231	-4.56478		29660.m000778	-4.22239	1.40136	1.03953		29693.m002002	-1.29834	1.44271	-4.14296		29912.m005388	1.46632	1.46317	4.52356		gi|255581185|ref|XM_002531360.1|	3.58496	5.56478	-1		30193.m000720	-1.558	3.1247	3.58496		gi|255538593|ref|XM_002510316.1|	5.16993	-4.14296	-3.62449		gi|255539185|ref|XM_002510612.1|	4.58496	-1.18569	3.66296		gi|255583178|ref|XM_002532309.1|	-4.14296	-1.74474	3.58496
gi|255555956|ref|XM_002518967.1|	-3.66296	-1.79586	-5.38082		gi|255551166|ref|XM_002516585.1|	-3.66296	1.91983	1.72489		gi|255571838|ref|XM_002526816.1|	-1.76783	1.0059	-4.16993		gi|255548460|ref|XM_002515241.1|	2.28951	1.0059	3.66296		gi|255546250|ref|XM_002514139.1|	5.35755	1.55748	-3.62449		gi|255545385|ref|XM_002513707.1|	-1.94029	4.87447	4.14296		gi|226958293|gb|GF100462.1|	4.54432	-3.58496	-4.14296		29634.m002111	1.20436	-2.5684	1.16273		30041.m000234	-4.56478	-5.99247	5.10154
29749.m000140	-2.36678	-1.55315	-3.05408		29278.m000137	-3.58496	1.57808	1.22561		27837.m000158	-1.80735	1.41751	-5.56478		27613.m000630	4.56478	3.66296	5.96963		29830.m001469	4.1964	1.77259	-3.62449		gi|255557960|ref|XM_002519963.1|	-1.59826	4.1964	3.58496		28623.m000404	4.16993	-3.58496	-4.54432		29929.m004642	1.28951	-3.58496	1.34556		28211.m000132	-3.66296	-5.11548	3.66296
29765.m000727	-1.86192	-1.4605	-2.37381		gi|255542577|ref|XM_002512306.1|	-3.66296	1.50479	1.49099		gi|255579644|ref|XM_002530617.1|	-1.68625	1.54057	-5.1565		gi|255538077|ref|XM_002510058.1|	4.54432	2.37551	6.11548		gi|255556517|ref|XM_002519247.1|	4.56478	2.06529	-3.62449		29772.m000321	-1.29834	2.37551	2.28963		29848.m004452	4.1964	-3.58496	-4.89077		30174.m008641	1.01249	-3.53398	1.24752		30174.m008654	-4.14296	-5.12928	2.52704
29904.m003055	-2.3594	-1.11548	-1.10497		gi|255565532|ref|XM_002523711.1|	-3.58496	1.28951	1.67138		30174.m008613	-5.16993	1.558	-5.11548		gi|255540454|ref|XM_002511246.1|	5.55459	2.24176	5.12928		30068.m002520	3.66296	1.24998	-3.62449		29864.m001503	-1.97982	2.23349	2.37537		gi|255556891|ref|XM_002519433.1|	3.58496	-3.62449	-4.85798		29930.m000611	2.87992	-2.0282	2.32193		29576.m000225	-4.92283	-3.62449	3.58496
gi|255552188|ref|XM_002517093.1|	-1.30146	-1	-1.30166		28320.m001081	-6.53398	1.69727	-1		gi|255552530|ref|XM_002517263.1|	-5.58496	1.09398	-5.11548		30131.m007182	3.58496	1.24998	5.85798		27623.m000142	3.62449	2.22094	-3.58496		gi|255560126|ref|XM_002521035.1|	-2.41504	1.26628	1.89907		gi|255575536|ref|XM_002528623.1|	2.77844	-4.1964	-4.14296		29983.m003308	2.9898	-1.5667	2.11548		gi|255565967|ref|XM_002523926.1|	-5.14296	-4.54432	4.14296
29848.m004633	-3.58496	-1.19502	-1.16534		gi|255546540|ref|XM_002514284.1|	-5.69116	2.1062	-1.77259		gi|255556122|ref|XM_002519050.1|	-5.14296	2.311	-3.62449		30171.m000409	3.66296	1.55873	5.12928		gi|255564734|ref|XM_002523316.1|	3.58496	1.73306	-3.58496		29683.m000472	-1.20436	1.11919	2.02365		29830.m001467	3.58496	-3.58496	-3.62449		29822.m003384	2.70802	-1.1127	1.45199		29950.m001185	-4.60486	-4.56478	3.58496
gi|255570127|ref|XM_002525980.1|	-3.58496	-1.45251	-1.30146		29625.m000716	-6.22882	1.18484	-1.33787		gi|255575816|ref|XM_002528761.1|	-6.25424	1.73499	-3.62449		29835.m000652	4.16993	1.2932	4.8413		30209.m001509	3.62449	1.27302	-4.58496		30154.m001133	-1.31411	1.31366	2.08517		30180.m001052	3.62449	-3.62449	-3.62449		29970.m001003	3.62449	-1.56294	1.35147		gi|255579587|ref|XM_002530589.1|	-4.56478	-4.60486	3.66296
29728.m000802	-1	-2.71536	-1.30581		gi|255537106|ref|XM_002509574.1|	-6.13614	1.29059	-1.46632		27401.m000287	-3.66296	1.74474	-5.1565		gi|255537348|ref|XM_002509695.1|	4.54432	1.0199	4.87447		gi|255569142|ref|XM_002525494.1|	3.66296	1.26628	-4.89077		gi|255548158|ref|XM_002515090.1|	-1.21573	1.6909	1.87101		gi|255538981|ref|XM_002510510.1|	3.58496	-3.62449	-4.16993		30169.m006258	3.66296	-1.48543	1.41163		30136.m001007	-4.22239	-4.54432	4.52356
29736.m002025	-1.43522	-3.62449	-1.45251		gi|255542795|ref|XM_002512415.1|	-5.59495	1.53201	-1.97982		gi|255550531|ref|XM_002516270.1|	-3.66296	1.24998	-4.56478		29598.m000468	4.56478	1.01355	3.58496		30174.m009093	5.57491	1.32193	-5.35755		gi|255548322|ref|XM_002515172.1|	-1.47805	1.01355	1.21459		gi|255539572|ref|XM_002510805.1|	3.66296	-4.85798	-3.66296		29705.m000598	1.26961	-1.44815	1.92328		gi|255583645|ref|XM_002532532.1|	-4.60486	-4.54432	4.54432
30147.m014113	-1.50696	-4.14296	-1.33027		gi|255550142|ref|XM_002516076.1|	-5.70966	1.35716	-1.54432		29772.m000317	-4.52356	1.0163	-4.54432		30198.m000883	3.66296	1.22628	3.58496		gi|255556415|ref|XM_002519196.1|	4.56478	1.27302	-5.99247		gi|255563617|ref|XM_002522765.1|	-1.66946	1.08501	1.39993		gi|255550594|ref|XM_002516301.1|	3.66296	-4.54432	-3.62449		30008.m000786	1.72935	-1.53201	2.10553		30147.m013928	-3.66296	-4.54432	4.22239
gi|255542845|ref|XM_002512440.1|	-2.59756	-3.62449	-2.10093		gi|255561539|ref|XM_002521734.1|	-5.14296	1	-1.71502		30225.m001703	-4.62449	1.53201	-4.54432		gi|255551548|ref|XM_002516774.1|	3.62449	1.2824	3.58496		gi|255569673|ref|XM_002525756.1|	4.87447	2	-5.85798		gi|255568769|ref|XM_002525310.1|	-1.66469	2.3178	1.29059		gi|255558365|ref|XM_002520164.1|	3.58496	-4.54432	-3.62449		30190.m011117	1.00817	-1	2.2575		30147.m014006	-3.58496	-4.1964	4.52356
gi|255562309|ref|XM_002522116.1|	-2.43741	-3.58496	-1.20282		30174.m009113	-4.8413	1.23349	-1		gi|255543436|ref|XM_002512735.1|	-4.56478	1.3836	-4.89077		gi|255561760|ref|XM_002521844.1|	3.58496	1.23349	3.66296		29272.m000044	4.56478	3.62449	-3.58496		gi|255577565|ref|XM_002529615.1|	-1.93093	1.75272	1.53051		27383.m000164	3.58496	-4.16993	-3.66296		29634.m002150	1.87732	-1.31731	1.20859		gi|255564465|ref|XM_002523183.1|	-3.66296	-3.62449	4.14296
gi|255558565|ref|XM_002520262.1|	-2.51692	-4.8983	-2.80043		gi|255574236|ref|XM_002527987.1|	-5.35755	1.23786	-1.14487		gi|255562443|ref|XM_002522182.1|	-4.22239	1.95042	-4.16993		30170.m014013	1.01355	3.58496	2.17834		gi|255554774|ref|XM_002518379.1|	4.56478	3.62449	-3.58496		gi|255554828|ref|XM_002518406.1|	-1.01027	1.75633	3.66296		30072.m000947	3.58496	-4.14296	-3.58496		30221.m002216	1.55069	-1.2115	1		29791.m000547	-3.66296	-3.58496	4.8413
29635.m000457	-1.0199	-3.62449	-4.22239		gi|255537002|ref|XM_002509522.1|	-5.14296	3.62449	1.3995		28226.m000883	-3.66296	1.91983	-3.62449		29863.m001085	1.46496	5.86625	2.3339		gi|255563563|ref|XM_002522738.1|	4.58496	3.66296	-3.62449		gi|255538455|ref|XM_002510247.1|	-2.07595	1.31366	4.14296		gi|255586619|ref|XM_002533896.1|	3.58496	-4.1964	-3.58496		29792.m000622	1.76939	-1.73419	1.26721		29912.m005474	-3.58496	-3.62449	4.54432
gi|255549525|ref|XM_002515769.1|	-1.94902	-3.62449	-3.62449		30169.m006443	-4.60486	3.62449	1.43857		29739.m003574	-3.66296	1.67807	-3.58496		30131.m006918	1.32193	4.58496	1.89907		29869.m001140	3.58496	3.58496	-4.22239		gi|255565322|ref|XM_002523607.1|	-2.1304	1.0199	4.14296		30068.m002530	3.62449	-3.62449	-2.4075		gi|255540052|ref|XM_002511045.1|	1.69459	-2.22518	1.21681		29877.m000482	-3.66296	-3.58496	4.56478
gi|255578175|ref|XM_002529911.1|	-1.38857	-4.14296	-3.58496		28329.m000064	-4.22239	3.58496	1.01355		gi|255540266|ref|XM_002511152.1|	-3.58496	1.70992	-3.62449		30174.m008771	1.5667	5.1565	1.15612		29222.m000409	3.66296	3.66296	-3.66296		29709.m001170	-1.39486	1	3.58496		30076.m004465	4.58496	-3.62449	-1.73068		29792.m000619	3.62449	-5.70966	1.45251		30169.m006584	-3.66296	-3.62449	4.54432
29588.m000862	-4.52356	-4.90689	-5.12928		gi|255547613|ref|XM_002514818.1|	-4.22239	3.58496	1.26628		gi|255538885|ref|XM_002510462.1|	-3.58496	1	-3.66296		29706.m001303	-1.24998	4.54432	1.78361		29929.m004780	3.62449	3.66296	-3.58496		gi|255550352|ref|XM_002516181.1|	-1.73306	1.14938	3.58496		30131.m007152	5.16993	-3.62449	-1.74894		29915.m000474	1.66025	-4.85798	1.19094		gi|255567400|ref|XM_002524634.1|	-3.66296	-3.62449	4.52356
gi|255538789|ref|XM_002510414.1|	-4.22239	-4.54432	-4.85798		29727.m000490	-3.66296	4.1964	1.21681		gi|255555500|ref|XM_002518741.1|	-3.66296	1.28951	-3.66296		30190.m011112	-1.26628	4.1964	1.47961		29841.m002826	3.62449	3.66296	-3.62449		gi|255571005|ref|XM_002526408.1|	-1.29834	1.14202	4.14296		30174.m008752	5.12928	-1.57154	-1.58496		30076.m004633	1.24393	-5.70966	1.57154		29703.m001488	-3.58496	-3.62449	3.58496
gi|255555736|ref|XM_002518858.1|	-5.14296	-4.89077	-5.1565		29900.m001625	-3.66296	4.58496	1.18117		28838.m000247	-4.56478	1.01355	-3.58496		29439.m000224	2.06496	4.14296	5.32193		29863.m001114	3.62449	3.66296	-3.62449		29801.m003174	-1.0199	1	4.89077		29838.m001724	1.37551	-2.75489	-3.66296		30068.m002616	3.62449	-2.67688	1.81216		29662.m000470	-3.58496	-3.58496	3.58496
gi|255561962|ref|XM_002521944.1|	-4.92283	-4.60486	-4.58496		gi|255545803|ref|XM_002513916.1|	-3.58496	4.56478	1.1062		gi|255540878|ref|XM_002511458.1|	-4.22239	1.46496	-3.58496		gi|255558643|ref|XM_002520301.1|	1.22628	3.66296	5.3339		30099.m001686	3.62449	3.62449	-3.62449		30157.m000795	-1.58496	1.2276	5.36923		28752.m000325	1.3322	-1.53051	-5.12928		30005.m001298	3.58496	-3.62449	1.22781		gi|255545977|ref|XM_002514003.1|	-3.58496	-3.58496	3.58496
30200.m000348	-4.60486	-5.54432	-3.58496		30074.m001407	-4.89077	5.35755	1.26976		29981.m000573	-4.56478	1.30146	-3.62449		30073.m002310	1.91194	5.34577	4.56478		29929.m004676	3.58496	3.58496	-3.58496		28293.m000037	-2.13386	1.66382	4.87447		27811.m000084	2.35199	-1.3806	-4.60486		29794.m003451	3.62449	-3.62449	1.26425		30120.m000362	-3.66296	-3.58496	3.58496
29751.m001870	-4.56478	-4.56478	-3.66296		30169.m006598	-4.92283	5.12928	1.33832		gi|255581934|ref|XM_002531720.1|	-4.56478	1.57154	-3.62449		30174.m008825	1.24393	5.12928	4.62449		gi|255560440|ref|XM_002521189.1|	3.66296	3.58496	-3.58496		gi|255545039|ref|XM_002513535.1|	-1.74474	2.17585	4.14296		30146.m003553	2.24257	-2.1247	-5.3339		30190.m011233	3.62449	-3.62449	1.2647		29739.m003645	-3.66296	-3.62449	3.58496
29868.m000353	-4.22239	-4.60486	-3.58496		30174.m009118	-4.60486	4.56478	1.17834		29482.m000172	-3.58496	3.62449	-5.56478		gi|255559760|ref|XM_002520854.1|	1.0199	4.58496	4.52356		29813.m001534	3.62449	4.54432	-3.62449		gi|255564799|ref|XM_002523348.1|	-1.69574	2.29999	4.52356		29762.m000491	3.58496	-1.32193	-4.14296		30024.m001691	4.87447	-4.54432	1.36405		gi|255570044|ref|XM_002525939.1|	-3.66296	-3.62449	3.58496
29613.m000379	-3.66296	-4.54432	-3.62449		gi|255537540|ref|XM_002509791.1|	-4.14296	5.56478	1.54432		gi|255540642|ref|XM_002511340.1|	-5.14296	4.56478	-6.35168		29736.m002075	1.47999	3.66296	3.58496		34943.m000014	3.62449	4.87447	-3.66296		gi|255546110|ref|XM_002514069.1|	-1.47705	1.73306	4.8413		29794.m003309	3.62449	-1.74474	-3.62449		29661.m000930	5.39232	-3.58496	1.69632		29729.m002273	-3.66296	-4.54432	3.58496
29923.m000817	-3.66296	-4.87447	-3.62449		29693.m001988	-3.66296	4.87447	2.19994		gi|255575714|ref|XM_002528711.1|	-4.56478	4.87447	-6.14975		29848.m004644	1.52356	3.62449	3.58496		gi|255566404|ref|XM_002524142.1|	3.58496	4.1964	-3.62449		gi|255578842|ref|XM_002530230.1|	-1.13566	1.72128	4.54432		29917.m001937	2.66296	-1.5482	-3.58496		29681.m001368	5.35755	-3.62449	2.05889		29999.m000207	-3.58496	-4.14296	3.58496
29864.m001473	-3.66296	-5.11548	-3.58496		gi|255558893|ref|XM_002520424.1|	-4.52356	4.87447	2.09433		gi|255548739|ref|XM_002515380.1|	-5.36923	5.73697	-3.58496		gi|255554411|ref|XM_002518199.1|	1.46632	3.62449	3.66296		28837.m000025	4.92283	5.1565	-3.62449		29729.m002353	-3.66296	1.24998	6.01495		gi|255564756|ref|XM_002523327.1|	4.56478	-1.72128	-4.14296		29647.m002112	4.58496	-3.08057	1.33015		gi|255548673|ref|XM_002515347.1|	-3.66296	-4.14296	3.66296
30205.m001590	-3.66296	-5.34577	-3.62449		gi|255558387|ref|XM_002520175.1|	-6.47032	5.54432	-2.1247		29716.m000307	-4.56478	5.55459	-3.62449		gi|255575842|ref|XM_002528773.1|	1.28951	4.58496	3.58496		gi|255571886|ref|XM_002526840.1|	4.56478	4.58496	-3.62449		30208.m001103	-3.66296	1.24998	5.11548		29612.m000381	1.15715	-2.62716	-2.41895		29668.m000320	4.62449	-3.62449	1.32193		gi|255583807|ref|XM_002532610.1|	-4.14296	-4.1964	3.58496
gi|255568154|ref|XM_002525007.1|	-3.66296	-5.69116	-4.54432		gi|255542329|ref|XM_002512182.1|	-5.72792	5.54432	-1.04026		gi|255551314|ref|XM_002516658.1|	-4.56478	5.54432	-3.66296		29724.m000857	4.87447	6	1.05853		gi|255576106|ref|XM_002528902.1|	4.22239	4.54432	-4.14296		gi|255549061|ref|XM_002515541.1|	-4.14296	1.23786	5.10154		29780.m001320	1.867	-2.6256	-1.42768		30174.m008862	4.54432	-3.62449	1.46632		30116.m000372	-3.66296	-3.58496	2.70344
gi|255566465|ref|XM_002524172.1|	-5.56478	-3.62449	-3.62449		gi|255536824|ref|XM_002509433.1|	-4.92283	5.1565	-1.24793		29729.m002352	-3.66296	5.38082	-3.66296		30068.m002671	4.87447	4.87447	1.24998		29588.m000870	3.62449	4.14296	-4.60486		gi|255582801|ref|XM_002532129.1|	-4.22239	1.60543	5.34577		gi|255572342|ref|XM_002527064.1|	1.02076	-2.67688	-1.14684		gi|255549045|ref|XM_002515533.1|	5.14296	-3.58496	1.15403		29669.m000808	-4.22239	-3.62449	1.87801
gi|255577709|ref|XM_002529685.1|	-5.1964	-3.58496	-4.16993		gi|255566198|ref|XM_002524041.1|	-5.38082	4.89077	-1.70562		29923.m000818	-3.58496	5.38082	-3.62449		29816.m000667	4.62449	4.58496	1.06963		gi|255547625|ref|XM_002514824.1|	3.62449	4.58496	-4.90689		30170.m013791	-5.69116	1.32193	3.58496		29635.m000455	2.04669	-1.30146	-1.02385		29666.m001487	1.31647	-1.2647	6.24793		30190.m011298	-4.56478	-3.58496	1.25634
27461.m000100	-3.66296	-3.62449	-4.89077		30073.m002251	-4.52356	4.54432	-2.22837		gi|255559371|ref|XM_002520660.1|	-3.66296	5.71882	-3.62449		30147.m014372	4.54432	4.1964	1.17834		gi|255553764|ref|XM_002517877.1|	4.1964	5.12928	-5.1565		30182.m000136	-5.56478	1.40136	4.8413		29969.m000264	1.0666	-1	-1.38874		30147.m014276	1.30968	-1.90949	5.3339		29822.m003338	-3.66296	-4.87447	1.54432
29815.m000503	-3.66296	-3.58496	-4.58496		30226.m002023	-5.14296	4.14296	-1.2115		30098.m001735	-3.66296	5.54432	-4.60486		30078.m002309	4.1964	5.1565	2.06667		28592.m000283	4.90689	4.1964	-5.70966		gi|255553222|ref|XM_002517608.1|	-5.39232	1.77923	4.56478		29642.m000279	1.3732	-1.30033	-1.09433		29637.m000736	1.558	-2.14345	3.66296		30078.m002261	-4.14296	-4.56478	1.49354
47543.m000013	-3.66296	-3.58496	-4.60486		gi|255550049|ref|XM_002516030.1|	-4.92283	3.62449	-1.57154		gi|255568093|ref|XM_002524977.1|	-3.66296	4.87447	-4.16993		30169.m006400	3.66296	4.58496	1.95936		29648.m001949	4.56478	3.62449	-4.54432		30138.m003886	-4.60486	1.50479	3.66296		29740.m000489	1.34211	-1.1247	-1.32193		29848.m004701	1.2115	-2.03882	3.66296		29912.m005420	-3.66296	-4.1964	1.50479
gi|255556750|ref|XM_002519363.1|	-3.58496	-3.58496	-4.58496		30147.m013749	-3.66296	4.54432	-1.46317		gi|255545605|ref|XM_002513817.1|	-5.38082	5.3339	-4.85798		29929.m004564	3.62449	4.54432	1.53201		gi|255558965|ref|XM_002520460.1|	4.60486	4.1964	-4.85798		gi|255549049|ref|XM_002515535.1|	-4.22239	1.0199	3.66296		gi|301341512|gb|HM150785.1|	1.34239	-1.31366	-1.30581		30190.m010771	1.89162	-1.19502	4.14296		gi|315307480|gb|HQ650106.1|	-3.66296	-4.16993	1.76912
gi|255571809|ref|XM_002526802.1|	-3.66296	-3.58496	-4.22239		gi|255582563|ref|XM_002532019.1|	-3.66296	4.1964	-1.40136		30190.m011054	-4.52356	5.40372	-4.92283		30018.m000549	3.62449	4.1964	1.37697		29908.m006247	4.22239	3.66296	-5.1565		27704.m000148	-4.92283	1	4.22239							29827.m002563	3.66296	-3.62449	5.56478		29648.m001963	-1.0199	-3.58496	4.14296
29908.m006175	-3.66296	-4.16993	-4.85798		gi|255543672|ref|XM_002512853.1|	-4.22239	3.66296	-1		gi|255574178|ref|XM_002527959.1|	-4.14296	5.73697	-5.11548		30199.m000880	3.62449	4.1964	1.65896		29912.m005538	3.62449	3.58496	-5.36923		gi|255569988|ref|XM_002525911.1|	-4.60486	1	4.56478							27965.m000111	3.66296	-3.58496	4.87447		28653.m000059	-1.24998	-1.74894	2
gi|255572354|ref|XM_002527070.1|	-3.66296	-4.54432	-4.56478		30147.m014082	-3.66296	3.62449	-1.59401		30147.m014136	-4.92283	4.14296	-4.58496		29769.m000465	4.90689	3.62449	2.32193		gi|255580439|ref|XM_002531000.1|	3.58496	3.62449	-4.87447		27985.m000869	-3.66296	1.53051	4.52356							30078.m002333	3.58496	-3.62449	4.56478		29739.m003652	-1.51326	-1.27302	1.25634
28966.m000524	-4.22239	-3.62449	-3.58496		gi|255586296|ref|XM_002533754.1|	-3.19494	3.25365	-1.29506		gi|255573573|ref|XM_002527665.1|	-4.89077	3.58496	-4.85798		29932.m000605	3.66296	3.66296	2.48403		30115.m001214	1.24393	4.1964	-6		29813.m001511	-3.58496	1.24998	4.22239							29661.m000915	4.22239	-4.16993	5.85798		29763.m000197	-1.55069	-1.28488	1.0135
29848.m004592	-4.52356	-3.62449	-3.62449							29842.m003624	-4.22239	4.54432	-4.58496		30078.m002284	3.62449	3.58496	2.1867		gi|255552952|ref|XM_002517473.1|	1.2115	4.85798	-3.62449		gi|255537028|ref|XM_002509535.1|	-3.66296	1.69632	3.58496							29661.m000938	4.60486	-4.1964	5.38082		29830.m001391	-1.9301	-1.57154	1.42999
29763.m000188	-3.66296	-4.16993	-3.62449							gi|255582436|ref|XM_002531960.1|	-4.56478	4.54432	-4.16993		30073.m002238	3.62449	3.66296	1.51658		gi|255561218|ref|XM_002521575.1|	1.24393	5.53398	-3.62449		29794.m003497	-3.66296	1.24998	3.66296							29673.m000917	5.14296	-4.1964	5.53398		gi|255558989|ref|XM_002520472.1|	-1.14684	-1.79607	3.58496
29804.m001552	-3.66296	-4.1964	-3.58496							29626.m000153	-5.14296	4.14296	-3.62449		gi|255564143|ref|XM_002523023.1|	3.62449	3.66296	1.73697		30174.m008720	1.558	4.1964	-4.16993		gi|255587409|ref|XM_002534218.1|	-3.58496	1.39402	3.66296							29813.m001492	4.56478	-3.62449	4.87447		gi|255577543|ref|XM_002529604.1|	-1.28951	-1.16115	3.66296
29634.m002069	-3.66296	-3.62449	-3.58496							gi|255555078|ref|XM_002518531.1|	-5.16993	4.56478	-3.62449		30128.m008606	4.1964	5.87447	3.66296		gi|255577609|ref|XM_002529636.1|	1.2115	3.62449	-4.56478		30147.m014218	-3.66296	6.73245	4.22239							30190.m011246	4.87447	-3.62449	4.52356		30138.m003955	-1.53713	-5.14296	1.10269
30156.m001702	-3.66296	-3.62449	-3.62449							gi|255585732|ref|XM_002533502.1|	-5.39232	4.87447	-3.62449		30147.m013961	4.58496	5.73697	4.56478		29805.m001495	1.77259	1.94029	-1.74894		gi|255561485|ref|XM_002521707.1|	-5.36923	5.84967	5.70966							30128.m009041	4.56478	-4.14296	3.66296		28802.m000132	-1.558	-5.1565	2.02756
29647.m002081	-3.66296	-3.62449	-3.66296							gi|255543309|ref|XM_002512672.1|	-4.22239	3.62449	-3.58496		30152.m002411	4.60486	5.57491	4.14296		29999.m000214	1.57154	1.73306	-1.77259		gi|255587099|ref|XM_002534090.1|	-4.89077	5.54432	5.3339							30138.m003985	4.58496	-3.62449	3.58496		gi|255586462|ref|XM_002533829.1|	-1.14487	-4.56478	2.19994
gi|255560417|ref|XM_002521178.1|	-3.66296	-3.62449	-3.66296							30128.m008991	-4.60486	3.62449	-3.58496		gi|255567659|ref|XM_002524763.1|	4.16993	5.54432	4.54432		27955.m000381	1.47999	3.58496	-1.90689		30170.m013659	-3.58496	3.58496	5.55459							29788.m000324	4.89077	-5.1565	3.66296		gi|448936063|gb|JX997186.1|	-1.13386	-4.60486	2.12496
29739.m003655	-3.58496	-3.62449	-3.66296							gi|255553976|ref|XM_002517983.1|	-4.89077	3.58496	-3.62449		29794.m003370	5.55459	3.66296	3.58496		30174.m008666	2.14296	3.62449	-1.01355		30194.m000057	-3.58496	3.66296	6.11548							gi|255541073|ref|XM_002511555.1|	4.89077	-4.56478	3.58496
29841.m002886	-3.58496	-3.62449	-3.62449							gi|255566081|ref|XM_002523983.1|	-4.89077	3.66296	-3.66296		29788.m000328	5.16993	4.54432	3.66296		29717.m000225	1.07635	2.07166	-3.66296		gi|255578470|ref|XM_002530054.1|	-6.24159	4.1964	4.22239							30128.m008982	3.58496	-5.11548	3.58496
gi|255587485|ref|XM_002534243.1|	-3.58496	-3.58496	-3.58496							29807.m000496	-4.22239	4.58496	-3.58496		30078.m002242	5.55459	4.14296	4.22239		gi|255588181|ref|XM_002534479.1|	1.70627	1.94902	-3.62449		29630.m000797	-4.89077	3.62449	3.58496							30131.m007290	3.62449	-5.53398	4.22239
27828.m000099	-5.11548	-4.85798	-1.85704							28515.m000307	-3.58496	4.60486	-3.58496		28469.m000073	4.56478	3.62449	4.54432							29667.m000353	-4.60486	3.58496	3.58496							29263.m000092	3.58496	-4.54432	4.22239
30169.m006389	-5.36923	-4.1964	-1.22781							gi|255566750|ref|XM_002524313.1|	-3.58496	4.54432	-3.62449		29708.m000193	4.89077	3.62449	5.14296							gi|255537718|ref|XM_002509880.1|	-4.52356	3.58496	3.58496							29279.m000134	3.62449	-4.60486	3.58496
29742.m001417	-3.58496	-4.60486	-1.34269							gi|255543037|ref|XM_002512536.1|	-3.58496	4.1964	-3.66296		gi|255567036|ref|XM_002524455.1|	4.56478	4.58496	4.54432							gi|255557726|ref|XM_002519847.1|	-4.56478	3.66296	3.58496							29842.m003610	3.58496	-4.14296	3.58496
29830.m001406	-3.66296	-4.56478	-1.30581							29638.m000524	-3.66296	4.1964	-3.66296		29670.m000146	3.62449	3.58496	4.9386							gi|255569681|ref|XM_002525760.1|	-4.22239	3.66296	3.66296							30148.m001442	3.66296	-4.14296	3.58496
30147.m014384	-3.66296	-5.12928	-1.14048							29647.m002003	-3.66296	4.1964	-3.62449		29908.m006268	3.62449	4.87447	4.14296							gi|255572948|ref|XM_002527359.1|	-4.22239	3.66296	3.58496							29739.m003687	3.58496	-3.58496	3.58496
29669.m000806	-3.66296	-3.62449	-1.19526							gi|255571272|ref|XM_002526540.1|	-3.66296	4.1964	-3.58496		29863.m001112	3.66296	5.1565	4.56478							gi|255560413|ref|XM_002521176.1|	-4.56478	4.56478	3.58496							gi|255558973|ref|XM_002520464.1|	3.58496	-3.58496	3.58496
29726.m004008	-4.14296	-3.62449	-1.0199							gi|255539309|ref|XM_002510674.1|	-4.22239	3.66296	-4.54432		30131.m007112	3.62449	5.35755	4.52356							gi|255584431|ref|XM_002532901.1|	-5.18322	4.1964	3.66296							29851.m002377	1	-5.12928	6.22882
gi|255593398|ref|XM_002535814.1|	-4.14296	-3.58496	-1.77259							29983.m003305	-3.58496	3.66296	-4.87447		29642.m000288	3.58496	4.54432	4.9386							29842.m003707	-4.52356	4.89077	4.54432							29638.m000527	2.14296	-5.69116	4.9386
										29862.m000333	-3.66296	3.62449	-4.85798		30128.m008553	3.58496	4.54432	5.10154							30068.m002660	-4.56478	5.1565	4.14296							29705.m000587	1.50696	-5.3339	4.56478
										gi|255558963|ref|XM_002520459.1|	-3.66296	3.58496	-4.85798		30190.m010928	3.58496	4.1964	4.56478							29733.m000742	-3.58496	4.90689	4.62449							gi|255543197|ref|XM_002512616.1|	1.14684	-6.22882	4.8413
										gi|255563626|ref|XM_002522769.1|	-3.66296	3.58496	-4.54432		29794.m003447	3.66296	4.58496	4.52356							30131.m006861	-3.66296	5.1565	4.52356							29794.m003422	1.35364	-4.87447	3.1062
										gi|255561730|ref|XM_002521829.1|	-3.58496	4.1964	-4.89077		gi|255571822|ref|XM_002526808.1|	3.62449	4.58496	4.56478							30136.m001005	-3.66296	4.56478	4.56478							30078.m002304	1.47999	-4.14296	3.58496
										29816.m000678	-3.66296	4.14296	-4.54432		29709.m001182	3.58496	4.1964	3.66296							29740.m000495	-3.66296	4.58496	5.10154							27847.m000125	1	-3.62449	3.58496
										gi|255554171|ref|XM_002518080.1|	-3.66296	4.1964	-4.16993		29736.m002073	3.62449	4.1964	3.58496							30190.m011320	-3.58496	4.87447	5.32193							gi|255537346|ref|XM_002509694.1|	1.22781	-3.58496	3.58496
										gi|255569037|ref|XM_002525442.1|	-3.66296	4.1964	-4.14296		28842.m000927	3.62449	4.89077	3.53398							gi|255543099|ref|XM_002512567.1|	-4.60486	3.62449	5.38082							30169.m006307	2	-4.14296	4.52356
										gi|255585739|ref|XM_002533505.1|	-3.66296	4.14296	-4.22239		28660.m000195	3.66296	4.54432	3.66296							gi|255576957|ref|XM_002529318.1|	-4.60486	4.1964	4.8413							gi|255587596|ref|XM_002534280.1|	1.24393	-4.1964	5.11548
										gi|255584316|ref|XM_002532848.1|	-3.58496	3.66296	-4.14296		29986.m001623	3.62449	4.58496	3.58496							gi|255583120|ref|XM_002532281.1|	-4.52356	3.66296	4.14296
										gi|255568937|ref|XM_002525393.1|	-3.66296	3.58496	-3.62449		29736.m002102	4.58496	4.87447	3.58496							30078.m002280	-4.22239	3.66296	4.56478
										30174.m008894	-3.66296	3.62449	-3.66296		29864.m001446	4.58496	4.56478	3.58496							gi|255565672|ref|XM_002523780.1|	-4.56478	3.58496	4.8413
										gi|255586011|ref|XM_002533629.1|	-3.66296	3.62449	-3.62449		gi|255572907|ref|XM_002527339.1|	4.16993	4.54432	3.58496							gi|255586667|ref|XM_002533917.1|	-4.56478	3.58496	4.56478
										30170.m014345	-1.89162	5.1565	-3.62449		gi|255560500|ref|XM_002521219.1|	4.1964	3.66296	3.66296							29804.m001501	-3.66296	3.66296	4.52356
										gi|255541103|ref|XM_002511570.1|	-1.29834	5.71882	-3.66296		gi|255562380|ref|XM_002522151.1|	4.60486	3.62449	3.58496							29842.m003623	-3.66296	3.58496	4.62449
										gi|255572976|ref|XM_002527373.1|	-1.69459	4.58496	-4.56478		29640.m000410	3.66296	3.58496	4.14296							gi|255546086|ref|XM_002514057.1|	-3.66296	3.58496	4.8413
										gi|255553144|ref|XM_002517569.1|	-1.58496	3.58496	-3.58496		gi|255571397|ref|XM_002526601.1|	3.62449	3.62449	4.14296							gi|255554697|ref|XM_002518341.1|	-3.66296	3.58496	4.14296
										gi|255577146|ref|XM_002529411.1|	-1.0199	4.1964	-3.62449		29929.m004532	3.62449	3.62449	3.66296							29815.m000501	-3.66296	3.58496	3.66296
										29872.m000541	-3.58496	5.34577	-1.97982		30221.m002241	3.58496	3.66296	3.66296							30147.m014249	-3.58496	3.58496	3.66296
										gi|255537466|ref|XM_002509754.1|	-3.66296	5.38082	-1.8606		29889.m003342	3.66296	3.62449	3.58496							30179.m000577	-3.58496	3.66296	3.58496
										gi|255578836|ref|XM_002530227.1|	-2.56585	6.34577	-1.29745		29827.m002670	3.62449	3.58496	3.58496							gi|255540412|ref|XM_002511225.1|	-3.66296	3.62449	3.58496
										gi|255571715|ref|XM_002526755.1|	-1.0199	6.34577	-2.54432		29989.m000426	3.58496	3.58496	3.58496							gi|255542059|ref|XM_002512048.1|	-3.66296	3.62449	3.58496
										gi|255588742|ref|XM_002534658.1|	-1.45251	5.70966	-1.95936		gi|255583281|ref|XM_002532359.1|	3.58496	3.66296	3.58496							27766.m000151	-3.66296	3.66296	3.58496
										gi|255579395|ref|XM_002530496.1|	-1.88368	1.71502	-2.558		28067.m000105	5.72792	1.40854	1.26976							gi|255537262|ref|XM_002509652.1|	-3.66296	3.66296	3.58496
										gi|255579616|ref|XM_002530603.1|	-1.98468	2.37091	-2.39102		29908.m006018	4.1964	1.53201	2.23349							gi|255561646|ref|XM_002521787.1|	-3.66296	3.66296	3.58496
										gi|255587068|ref|XM_002534076.1|	-2.37056	1.06862	-1.7212		gi|255550553|ref|XM_002516281.1|	3.58496	1.0199	2.31431							29648.m001929	-3.66296	3.58496	3.58496
										gi|255573753|ref|XM_002527752.1|	-2.94902	1.34543	-1.50207		gi|255567063|ref|XM_002524468.1|	4.1964	1.48278	1.08665							30078.m002281	-3.66296	3.58496	3.58496
										gi|255619283|ref|XM_002539963.1|	-2.75291	1.01238	-1.06474		28492.m000470	3.66296	1.23349	1.72128							gi|255577305|ref|XM_002529488.1|	-3.66296	3.58496	3.58496
										gi|255538209|ref|XM_002510124.1|	-1.04555	2.06774	-1.03631		29981.m000595	3.66296	1.27302	1.23851							gi|255544821|ref|XM_002513426.1|	-3.66296	4.1964	4.14296
										30055.m001609	-1.02672	1.34445	-1.94902		gi|255567787|ref|XM_002524826.1|	3.62449	1.1375	1.22628							gi|255561368|ref|XM_002521649.1|	-3.66296	4.1964	3.58496
										gi|255540476|ref|XM_002511257.1|	-1.10458	1.28896	-1.04768		27777.m000273	3.36535	1.38439	-1.12553							gi|255555834|ref|XM_002518907.1|	-3.66296	4.56478	3.58496
										27964.m000358	-1.08517	1.40881	-1.43995		30073.m002221	4.56478	1.02722	-1.25014							gi|255590990|ref|XM_002535366.1|	-3.66296	4.54432	3.58496
										gi|255575071|ref|XM_002528395.1|	-1.00271	1.07721	-1.34724		gi|255549909|ref|XM_002515960.1|	4.56478	1.27302	-1.2115
										gi|255568081|ref|XM_002524971.1|	-1.9935	1.98672	-1.19199		27744.m000096	4.1964	2.66928	-1.0163
										gi|255571112|ref|XM_002526461.1|	-2.25815	2.08517	-1		28049.m000309	4.56478	2.08517	-1.19502
										gi|255579282|ref|XM_002530441.1|	-2.08017	1.65757	-1.16457		gi|255584707|ref|XM_002533029.1|	4.87447	1.9386	-1.02076
										gi|255569584|ref|XM_002525712.1|	-1.52973	2.2127	-1.33113
										gi|255570864|ref|XM_002526338.1|	-1.6854	2.04607	-1.18975
										30138.m003939	-1.72741	1.75899	-1.12496
										gi|255561227|ref|XM_002521579.1|	-1.38782	1.89862	-1.2293
										30147.m014158	-1.43741	1.70171	-1.1587
										gi|255584607|ref|XM_002532982.1|	-1.45705	1.56847	-1.02495
										gi|255568254|ref|XM_002525056.1|	-1.77259	1.50479	-1.78427
										29662.m000465	-2.06496	1.08964	-1.2115
										gi|288191376|gb|FJ670089.1|	-1.87028	1.24159	-1.01902

## Sheet: 聚类分支上基因GO分析
Cluster A
Gene	GO Component	GO Function	GO Process
gi|255573875|ref|XM_002527811.1|	GO:0030139//endocytic vesicle;GO:0031090//organelle membrane	GO:0017111//nucleoside-triphosphatase activity;GO:0032561//guanyl ribonucleotide binding;GO:0005515//protein binding	GO:0009725//response to hormone stimulus;GO:0006892//post-Golgi vesicle-mediated transport;GO:0009207;GO:0006897//endocytosis
29737.m001207	-	-	-
gi|255540586|ref|XM_002511312.1|	-	-	-
gi|255541313|ref|XM_002511675.1|	GO:0044424//intracellular part	GO:0016859//cis-trans isomerase activity	GO:0006520//cellular amino acid metabolic process
29950.m001177	-	-	-
gi|255555566|ref|XM_002518774.1|	GO:0009532//plastid stroma	GO:0046914//transition metal ion binding;GO:0005083//small GTPase regulator activity;GO:0008483//transaminase activity	GO:0032012//regulation of ARF protein signal transduction;GO:0009085//lysine biosynthetic process;GO:0009627//systemic acquired resistance
gi|255555956|ref|XM_002518967.1|	-	-	-
29749.m000140	-	-	-
29765.m000727	-	-	-
29904.m003055	-	-	-
gi|255552188|ref|XM_002517093.1|	GO:0009536//plastid	GO:0016836//hydro-lyase activity	GO:0006547//histidine metabolic process
29848.m004633	-	-	-
gi|255570127|ref|XM_002525980.1|	-	GO:0016462//pyrophosphatase activity;GO:0032559;GO:0019206//nucleoside kinase activity	GO:0006796//phosphate-containing compound metabolic process
29728.m000802	-	-	-
29736.m002025	-	-	-
30147.m014113	-	-	-
gi|255542845|ref|XM_002512440.1|	-	GO:0005515//protein binding	GO:0044267//cellular protein metabolic process;GO:0050896//response to stimulus
gi|255562309|ref|XM_002522116.1|	GO:0044464//cell part	-	-
gi|255558565|ref|XM_002520262.1|	GO:0043231//intracellular membrane-bounded organelle	GO:0003677//DNA binding;GO:0001071//nucleic acid binding transcription factor activity;GO:0016628//oxidoreductase activity, acting on the CH-CH group of donors, NAD or NADP as acceptor	GO:0006351//transcription, DNA-dependent
29635.m000457	-	-	-
gi|255549525|ref|XM_002515769.1|	GO:0043231//intracellular membrane-bounded organelle	-	GO:0009987//cellular process
gi|255578175|ref|XM_002529911.1|	-	-	-
29588.m000862	-	-	-
gi|255538789|ref|XM_002510414.1|	-	-	-
gi|255555736|ref|XM_002518858.1|	GO:0005741//mitochondrial outer membrane	-	GO:0006612//protein targeting to membrane
gi|255561962|ref|XM_002521944.1|	GO:0044439	GO:0046914//transition metal ion binding	GO:0006625//protein targeting to peroxisome;GO:0009062//fatty acid catabolic process;GO:0009653//anatomical structure morphogenesis
30200.m000348	-	-	-
29751.m001870	-	-	-
29868.m000353	-	-	-
29613.m000379	-	-	-
29923.m000817	-	-	-
29864.m001473	-	-	-
30205.m001590	-	-	-
gi|255568154|ref|XM_002525007.1|	-	GO:0004871//signal transducer activity;GO:0004713//protein tyrosine kinase activity;GO:0032559	GO:0006464//cellular protein modification process
gi|255566465|ref|XM_002524172.1|	GO:0044444//cytoplasmic part	GO:0005515//protein binding	GO:0009651//response to salt stress
gi|255577709|ref|XM_002529685.1|	-	GO:0004672//protein kinase activity;GO:0016628//oxidoreductase activity, acting on the CH-CH group of donors, NAD or NADP as acceptor;GO:0032559	GO:0006464//cellular protein modification process
27461.m000100	-	-	-
29815.m000503	-	-	-
47543.m000013	-	-	-
gi|255556750|ref|XM_002519363.1|	GO:0043231//intracellular membrane-bounded organelle	GO:0046872//metal ion binding;GO:0015924	GO:0048513//organ development;GO:0006487//protein N-linked glycosylation
gi|255571809|ref|XM_002526802.1|	-	GO:0003824//catalytic activity	-
29908.m006175	-	-	-
gi|255572354|ref|XM_002527070.1|	-	GO:0003723//RNA binding	GO:0040007//growth;GO:0006396//RNA processing
28966.m000524	-	-	-
29848.m004592	-	-	-
29763.m000188	-	-	-
29804.m001552	-	-	-
29634.m002069	-	-	-
30156.m001702	-	-	-
29647.m002081	-	-	-
gi|255560417|ref|XM_002521178.1|	-	GO:0004091//carboxylesterase activity	-
29739.m003655	-	-	-
29841.m002886	-	-	-
gi|255587485|ref|XM_002534243.1|	-	-	-
27828.m000099	-	-	-
30169.m006389	-	-	-
29742.m001417	-	-	-
29830.m001406	-	-	-
30147.m014384	-	-	-
29669.m000806	-	-	-
29726.m004008	-	-	-
gi|255593398|ref|XM_002535814.1|	GO:0016020//membrane	GO:0015075//ion transmembrane transporter activity;GO:0005488//binding	GO:0006810//transport
Cluster B
Gene	GO Component	GO Function	GO Process
29908.m006221	-	-	-
29682.m000591	-	-	-
29726.m003890	-	-	-
29759.m000276	-	-	-
29794.m003439	-	-	-
29660.m000778	-	-	-
gi|255551166|ref|XM_002516585.1|	-	-	-
29278.m000137	-	-	-
gi|255542577|ref|XM_002512306.1|	GO:0043234//protein complex;GO:0031224//intrinsic to membrane;GO:0030312//external encapsulating structure	GO:0016787//hydrolase activity	-
gi|255565532|ref|XM_002523711.1|	GO:0030874//nucleolar chromatin	GO:0008135//translation factor activity, nucleic acid binding	GO:0006412//translation;GO:0007126//meiosis;GO:0009553//embryo sac development;GO:0070076//histone lysine demethylation
28320.m001081	-	-	-
gi|255546540|ref|XM_002514284.1|	-	GO:0016620//oxidoreductase activity, acting on the aldehyde or oxo group of donors, NAD or NADP as acceptor	GO:0008152//metabolic process
29625.m000716	-	-	-
gi|255537106|ref|XM_002509574.1|	GO:0043231//intracellular membrane-bounded organelle;GO:0044444//cytoplasmic part;GO:0016020//membrane	GO:0005488//binding	GO:0006887//exocytosis;GO:0015031//protein transport
gi|255542795|ref|XM_002512415.1|	GO:0030312//external encapsulating structure	GO:0030234//enzyme regulator activity;GO:0004091//carboxylesterase activity	GO:0071555//cell wall organization
gi|255550142|ref|XM_002516076.1|	GO:0044424//intracellular part	GO:0016765//transferase activity, transferring alkyl or aryl (other than methyl) groups	GO:0006596//polyamine biosynthetic process;GO:0030154//cell differentiation;GO:0000902//cell morphogenesis;GO:0009888//tissue development;GO:0060918//auxin transport
gi|255561539|ref|XM_002521734.1|	-	-	-
30174.m009113	-	-	-
gi|255574236|ref|XM_002527987.1|	GO:0009534//chloroplast thylakoid	GO:0022892	GO:0006605//protein targeting
gi|255537002|ref|XM_002509522.1|	GO:0031224//intrinsic to membrane	GO:0005275//amine transmembrane transporter activity	GO:0009628//response to abiotic stimulus;GO:0006865//amino acid transport
30169.m006443	-	-	-
28329.m000064	-	-	-
gi|255547613|ref|XM_002514818.1|	-	GO:0004871//signal transducer activity;GO:0004713//protein tyrosine kinase activity;GO:0032559	GO:0042742//defense response to bacterium;GO:0006468//protein phosphorylation
29727.m000490	-	-	-
29900.m001625	-	-	-
gi|255545803|ref|XM_002513916.1|	GO:0009534//chloroplast thylakoid;GO:0044436	GO:0004601//peroxidase activity;GO:0004812//aminoacyl-tRNA ligase activity;GO:0005506//iron ion binding;GO:0032559	GO:0006418//tRNA aminoacylation for protein translation;GO:0006950//response to stress
30074.m001407	-	-	-
30169.m006598	-	-	-
30174.m009118	-	-	-
gi|255537540|ref|XM_002509791.1|	-	-	-
29693.m001988	-	-	-
gi|255558893|ref|XM_002520424.1|	-	-	-
gi|255558387|ref|XM_002520175.1|	-	GO:0032559;GO:0042623//ATPase activity, coupled	-
gi|255542329|ref|XM_002512182.1|	-	GO:0004702//receptor signaling protein serine/threonine kinase activity;GO:0032559	GO:0006464//cellular protein modification process
gi|255536824|ref|XM_002509433.1|	-	GO:0043167//ion binding;GO:0008422//beta-glucosidase activity	GO:0044238//primary metabolic process
gi|255566198|ref|XM_002524041.1|	-	-	-
30073.m002251	-	-	-
30226.m002023	-	-	-
gi|255550049|ref|XM_002516030.1|	-	GO:0032561//guanyl ribonucleotide binding;GO:0003824//catalytic activity	GO:0006810//transport;GO:0035556//intracellular signal transduction
30147.m013749	-	-	-
gi|255582563|ref|XM_002532019.1|	GO:0043231//intracellular membrane-bounded organelle	GO:0004091//carboxylesterase activity	GO:0010467//gene expression
gi|255543672|ref|XM_002512853.1|	GO:0015629//actin cytoskeleton	-	GO:0016049//cell growth;GO:0000904//cell morphogenesis involved in differentiation;GO:0030036//actin cytoskeleton organization
30147.m014082	-	-	-
gi|255586296|ref|XM_002533754.1|	GO:0009532//plastid stroma;GO:0009526//plastid envelope;GO:0009534//chloroplast thylakoid;GO:0034357;GO:0005576//extracellular region	GO:0008187//poly-pyrimidine tract binding;GO:0009055//electron carrier activity;GO:0000166//nucleotide binding;GO:0050662//coenzyme binding;GO:0008937//ferredoxin-NAD(P) reductase activity	GO:0006952//defense response;GO:0022900//electron transport chain;GO:0051234//establishment of localization
Cluster C
Gene	GO Component	GO Function	GO Process
gi|255536722|ref|XM_002509382.1|	GO:0009941//chloroplast envelope;GO:0031224//intrinsic to membrane	GO:0005342//organic acid transmembrane transporter activity;GO:0015145//monosaccharide transmembrane transporter activity	GO:0015717//triose phosphate transport;GO:0009642//response to light intensity;GO:0015711//organic anion transport
30131.m007059	-	-	-
gi|255571518|ref|XM_002526661.1|	GO:0009570//chloroplast stroma	-	GO:0051125//regulation of actin nucleation;GO:0000904//cell morphogenesis involved in differentiation
28842.m000937	-	-	-
27894.m000798	-	-	-
29693.m002002	-	-	-
gi|255571838|ref|XM_002526816.1|	GO:0005838//proteasome regulatory particle	-	GO:0009887//organ morphogenesis;GO:0019941//modification-dependent protein catabolic process
27837.m000158	-	-	-
gi|255579644|ref|XM_002530617.1|	GO:0043231//intracellular membrane-bounded organelle	GO:0046914//transition metal ion binding	-
30174.m008613	-	-	-
gi|255552530|ref|XM_002517263.1|	GO:0043231//intracellular membrane-bounded organelle	GO:0017111//nucleoside-triphosphatase activity;GO:0032561//guanyl ribonucleotide binding	GO:0022613//ribonucleoprotein complex biogenesis;GO:0009207
gi|255556122|ref|XM_002519050.1|	-	-	-
gi|255575816|ref|XM_002528761.1|	GO:0015630//microtubule cytoskeleton	GO:0003774//motor activity;GO:0032559	GO:0007017//microtubule-based process
27401.m000287	-	-	-
gi|255550531|ref|XM_002516270.1|	-	GO:0046914//transition metal ion binding;GO:0016407//acetyltransferase activity	-
29772.m000317	-	-	-
30225.m001703	-	-	-
gi|255543436|ref|XM_002512735.1|	-	GO:0016405//CoA-ligase activity;GO:0016703;GO:0032559	GO:0006725//cellular aromatic compound metabolic process
gi|255562443|ref|XM_002522182.1|	GO:0044464//cell part	GO:0005215//transporter activity	GO:0006810//transport
28226.m000883	-	-	-
29739.m003574	-	-	-
gi|255540266|ref|XM_002511152.1|	GO:0030529//ribonucleoprotein complex	GO:0016787//hydrolase activity;GO:0005198//structural molecule activity	GO:0019538//protein metabolic process;GO:0010467//gene expression
gi|255538885|ref|XM_002510462.1|	GO:0043231//intracellular membrane-bounded organelle	GO:0001071//nucleic acid binding transcription factor activity;GO:0043565//sequence-specific DNA binding;GO:0005515//protein binding	GO:0009888//tissue development;GO:0010051//xylem and phloem pattern formation;GO:0009755//hormone-mediated signaling pathway;GO:0048513//organ development;GO:0009791//post-embryonic development;GO:0006351//transcription, DNA-dependent;GO:0000578//embryonic axis specification
gi|255555500|ref|XM_002518741.1|	GO:0009526//plastid envelope;GO:0009532//plastid stroma;GO:0005576//extracellular region	GO:0004175//endopeptidase activity;GO:0046914//transition metal ion binding	GO:0006508//proteolysis;GO:0010038//response to metal ion
28838.m000247	-	-	-
gi|255540878|ref|XM_002511458.1|	-	GO:0005488//binding;GO:0016790//thiolester hydrolase activity	GO:0019941//modification-dependent protein catabolic process
29981.m000573	-	-	-
gi|255581934|ref|XM_002531720.1|	GO:0044464//cell part	GO:0003676//nucleic acid binding	-
29482.m000172	-	-	-
gi|255540642|ref|XM_002511340.1|	GO:0019866//organelle inner membrane;GO:0009941//chloroplast envelope;GO:0031224//intrinsic to membrane	GO:0005342//organic acid transmembrane transporter activity;GO:0008514//organic anion transmembrane transporter activity;GO:0015291//secondary active transmembrane transporter activity	GO:0015711//organic anion transport
gi|255575714|ref|XM_002528711.1|	GO:0009534//chloroplast thylakoid	GO:0015036//disulfide oxidoreductase activity	GO:0019725//cellular homeostasis
gi|255548739|ref|XM_002515380.1|	GO:0043231//intracellular membrane-bounded organelle	GO:0016289//CoA hydrolase activity;GO:0016829//lyase activity	GO:0009062//fatty acid catabolic process
29716.m000307	-	-	-
gi|255551314|ref|XM_002516658.1|	GO:0044432//endoplasmic reticulum part;GO:0044425//membrane part	GO:0032561//guanyl ribonucleotide binding;GO:0030695//GTPase regulator activity;GO:0019899//enzyme binding	GO:0006810//transport
29729.m002352	-	-	-
29923.m000818	-	-	-
gi|255559371|ref|XM_002520660.1|	GO:0043232;GO:0043231//intracellular membrane-bounded organelle	GO:0003676//nucleic acid binding	GO:0051316//attachment of spindle microtubules to kinetochore involved in meiotic chromosome segregation
30098.m001735	-	-	-
gi|255568093|ref|XM_002524977.1|	-	GO:0005515//protein binding;GO:0004175//endopeptidase activity	GO:0019538//protein metabolic process;GO:0044092//negative regulation of molecular function
gi|255545605|ref|XM_002513817.1|	-	-	-
30190.m011054	-	-	-
gi|255574178|ref|XM_002527959.1|	GO:0043231//intracellular membrane-bounded organelle	GO:0005488//binding	-
30147.m014136	-	-	-
gi|255573573|ref|XM_002527665.1|	GO:0009536//plastid	-	-
29842.m003624	-	-	-
gi|255582436|ref|XM_002531960.1|	-	GO:0016407//acetyltransferase activity	-
29626.m000153	-	-	-
gi|255555078|ref|XM_002518531.1|	GO:0044464//cell part	GO:0046914//transition metal ion binding	-
gi|255585732|ref|XM_002533502.1|	GO:0031410//cytoplasmic vesicle	GO:0060089;GO:0016628//oxidoreductase activity, acting on the CH-CH group of donors, NAD or NADP as acceptor	GO:0007165//signal transduction;GO:0008152//metabolic process
gi|255543309|ref|XM_002512672.1|	GO:0044444//cytoplasmic part;GO:0016020//membrane	-	-
30128.m008991	-	-	-
gi|255553976|ref|XM_002517983.1|	GO:0043231//intracellular membrane-bounded organelle	GO:0016747//transferase activity, transferring acyl groups other than amino-acyl groups;GO:0008757//S-adenosylmethionine-dependent methyltransferase activity;GO:0003676//nucleic acid binding	GO:0032776//DNA methylation on cytosine
gi|255566081|ref|XM_002523983.1|	GO:0009528//plastid inner membrane	GO:0015151//alpha-glucoside transmembrane transporter activity	GO:0005984//disaccharide metabolic process;GO:0051707//response to other organism;GO:0005982//starch metabolic process;GO:0009628//response to abiotic stimulus;GO:0032501//multicellular organismal process;GO:0000017//alpha-glucoside transport
29807.m000496	-	-	-
28515.m000307	-	-	-
gi|255566750|ref|XM_002524313.1|	-	GO:0003676//nucleic acid binding;GO:0008168//methyltransferase activity	GO:0010467//gene expression;GO:0009451//RNA modification
gi|255543037|ref|XM_002512536.1|	GO:0044464//cell part	GO:0046914//transition metal ion binding	-
29638.m000524	-	-	-
29647.m002003	-	-	-
gi|255571272|ref|XM_002526540.1|	GO:0044424//intracellular part	-	GO:0044248//cellular catabolic process;GO:0006950//response to stress;GO:0010260//organ senescence
gi|255539309|ref|XM_002510674.1|	GO:0030312//external encapsulating structure	GO:0004175//endopeptidase activity;GO:0016628//oxidoreductase activity, acting on the CH-CH group of donors, NAD or NADP as acceptor	GO:0019538//protein metabolic process;GO:0012501//programmed cell death
29983.m003305	-	-	-
29862.m000333	-	-	-
gi|255558963|ref|XM_002520459.1|	GO:0009526//plastid envelope;GO:0031224//intrinsic to membrane	GO:0046914//transition metal ion binding;GO:0000254//C-4 methylsterol oxidase activity	GO:0006631//fatty acid metabolic process
gi|255563626|ref|XM_002522769.1|	-	GO:0004702//receptor signaling protein serine/threonine kinase activity;GO:0032559	GO:0006464//cellular protein modification process
gi|255561730|ref|XM_002521829.1|	GO:0044464//cell part	GO:0017111//nucleoside-triphosphatase activity;GO:0003676//nucleic acid binding;GO:0032559	-
29816.m000678	-	-	-
gi|255554171|ref|XM_002518080.1|	-	-	-
gi|255569037|ref|XM_002525442.1|	GO:0044464//cell part	GO:0004672//protein kinase activity;GO:0032559	GO:0006464//cellular protein modification process
gi|255585739|ref|XM_002533505.1|	GO:0031234//extrinsic to internal side of plasma membrane;GO:0031461//cullin-RING ubiquitin ligase complex	GO:0016301//kinase activity;GO:0005515//protein binding;GO:0016628//oxidoreductase activity, acting on the CH-CH group of donors, NAD or NADP as acceptor;GO:0032559	GO:0006464//cellular protein modification process
gi|255584316|ref|XM_002532848.1|	GO:0031224//intrinsic to membrane	GO:0005249//voltage-gated potassium channel activity;GO:0005221//intracellular cyclic nucleotide activated cation channel activity;GO:0005515//protein binding;GO:0000166//nucleotide binding	GO:0033554//cellular response to stress;GO:0006816//calcium ion transport;GO:0007165//signal transduction
gi|255568937|ref|XM_002525393.1|	-	GO:0042393//histone binding;GO:0046914//transition metal ion binding	-
30174.m008894	-	-	-
gi|255586011|ref|XM_002533629.1|	GO:0043231//intracellular membrane-bounded organelle	GO:0016741	GO:0006730//one-carbon metabolic process
30170.m014345	-	-	-
gi|255541103|ref|XM_002511570.1|	GO:0009536//plastid	-	-
gi|255572976|ref|XM_002527373.1|	-	GO:0003676//nucleic acid binding	-
gi|255553144|ref|XM_002517569.1|	GO:0009570//chloroplast stroma	-	-
gi|255577146|ref|XM_002529411.1|	GO:0009536//plastid	GO:0016160//amylase activity;GO:0043167//ion binding;GO:0016758//transferase activity, transferring hexosyl groups	GO:0007275//multicellular organismal development;GO:0003006//developmental process involved in reproduction;GO:0044238//primary metabolic process
29872.m000541	-	-	-
gi|255537466|ref|XM_002509754.1|	GO:0009536//plastid	GO:0016881//acid-amino acid ligase activity;GO:0032559	GO:0006749//glutathione metabolic process
gi|255578836|ref|XM_002530227.1|	GO:0031090//organelle membrane	-	-
gi|255571715|ref|XM_002526755.1|	-	-	GO:0009064//glutamine family amino acid metabolic process
gi|255588742|ref|XM_002534658.1|	-	GO:0003676//nucleic acid binding;GO:0003678//DNA helicase activity;GO:0032559	GO:0006259//DNA metabolic process;GO:0003006//developmental process involved in reproduction
gi|255579395|ref|XM_002530496.1|	-	-	-
gi|255579616|ref|XM_002530603.1|	-	GO:0003676//nucleic acid binding	-
gi|255587068|ref|XM_002534076.1|	-	GO:0019783//small conjugating protein-specific protease activity;GO:0005515//protein binding;GO:0016790//thiolester hydrolase activity	GO:0070646//protein modification by small protein removal;GO:0019941//modification-dependent protein catabolic process
gi|255573753|ref|XM_002527752.1|	-	-	-
gi|255619283|ref|XM_002539963.1|	-	GO:0016829//lyase activity	-
gi|255538209|ref|XM_002510124.1|	GO:0005576//extracellular region;GO:0009536//plastid	GO:0004175//endopeptidase activity;GO:0005488//binding;GO:0016628//oxidoreductase activity, acting on the CH-CH group of donors, NAD or NADP as acceptor	GO:0019538//protein metabolic process;GO:0006950//response to stress
30055.m001609	-	-	-
gi|255540476|ref|XM_002511257.1|	GO:0009536//plastid	GO:0051536//iron-sulfur cluster binding;GO:0042802//identical protein binding;GO:0030234//enzyme regulator activity;GO:0003824//catalytic activity	GO:0045333//cellular respiration;GO:0031325//positive regulation of cellular metabolic process;GO:0019359//nicotinamide nucleotide biosynthetic process;GO:0031163;GO:0043085//positive regulation of catalytic activity
27964.m000358	-	-	-
gi|255575071|ref|XM_002528395.1|	-	GO:0031406//carboxylic acid binding	-
gi|255568081|ref|XM_002524971.1|	-	GO:0005515//protein binding;GO:0004175//endopeptidase activity	GO:0019538//protein metabolic process;GO:0044092//negative regulation of molecular function
gi|255571112|ref|XM_002526461.1|	GO:0009536//plastid;GO:0044429//mitochondrial part	GO:0016651//oxidoreductase activity, acting on NAD(P)H;GO:0046914//transition metal ion binding;GO:0042802//identical protein binding;GO:0004470//malic enzyme activity;GO:0016831//carboxy-lyase activity;GO:0032559	GO:0043648//dicarboxylic acid metabolic process;GO:0006970//response to osmotic stress
gi|255579282|ref|XM_002530441.1|	GO:0031224//intrinsic to membrane	-	GO:0006810//transport
gi|255569584|ref|XM_002525712.1|	GO:0009521;GO:0031224//intrinsic to membrane;GO:0009534//chloroplast thylakoid	GO:0046906//tetrapyrrole binding;GO:0043169//cation binding	GO:0006464//cellular protein modification process;GO:0006091//generation of precursor metabolites and energy
gi|255570864|ref|XM_002526338.1|	-	-	-
30138.m003939	-	-	-
gi|255561227|ref|XM_002521579.1|	-	GO:0016616//oxidoreductase activity, acting on the CH-OH group of donors, NAD or NADP as acceptor;GO:0016772//transferase activity, transferring phosphorus-containing groups;GO:0000166//nucleotide binding	GO:0006566//threonine metabolic process;GO:0006549//isoleucine metabolic process;GO:0000097//sulfur amino acid biosynthetic process;GO:0006796//phosphate-containing compound metabolic process
30147.m014158	-	-	-
gi|255584607|ref|XM_002532982.1|	GO:0043231//intracellular membrane-bounded organelle	GO:0016791//phosphatase activity	-
gi|255568254|ref|XM_002525056.1|	GO:0016020//membrane	GO:0043169//cation binding;GO:0008238//exopeptidase activity;GO:0008144//drug binding;GO:0008237//metallopeptidase activity	GO:0019538//protein metabolic process;GO:0060918//auxin transport
29662.m000465	-	-	-
gi|288191376|gb|FJ670089.1|	GO:0031224//intrinsic to membrane;GO:0009534//chloroplast thylakoid	GO:0048037//cofactor binding;GO:0050136//NADH dehydrogenase (quinone) activity	GO:0051234//establishment of localization;GO:0022904//respiratory electron transport chain
Cluster D
Gene	GO Component	GO Function	GO Process
30079.m000451	-	-	-
29588.m000856	-	-	-
29761.m000412	-	-	-
29986.m001638	-	-	-
gi|255539009|ref|XM_002510524.1|	GO:0043231//intracellular membrane-bounded organelle	GO:0015036//disulfide oxidoreductase activity	GO:0019725//cellular homeostasis
29912.m005388	-	-	-
gi|255548460|ref|XM_002515241.1|	GO:0043231//intracellular membrane-bounded organelle	GO:0003676//nucleic acid binding;GO:0042623//ATPase activity, coupled;GO:0032559	GO:0009756//carbohydrate mediated signaling;GO:0006261//DNA-dependent DNA replication
27613.m000630	-	-	-
gi|255538077|ref|XM_002510058.1|	GO:0043231//intracellular membrane-bounded organelle	-	GO:0006970//response to osmotic stress
gi|255540454|ref|XM_002511246.1|	GO:0009536//plastid	-	-
30131.m007182	-	-	-
30171.m000409	-	-	-
29835.m000652	-	-	-
gi|255537348|ref|XM_002509695.1|	-	-	-
29598.m000468	-	-	-
30198.m000883	-	-	-
gi|255551548|ref|XM_002516774.1|	-	GO:0005488//binding	-
gi|255561760|ref|XM_002521844.1|	GO:0031224//intrinsic to membrane	-	GO:0015833//peptide transport
30170.m014013	-	-	-
29863.m001085	-	-	-
30131.m006918	-	-	-
30174.m008771	-	-	-
29706.m001303	-	-	-
30190.m011112	-	-	-
29439.m000224	-	-	-
gi|255558643|ref|XM_002520301.1|	GO:0043231//intracellular membrane-bounded organelle	GO:0008170//N-methyltransferase activity	GO:0031167//rRNA methylation
30073.m002310	-	-	-
30174.m008825	-	-	-
gi|255559760|ref|XM_002520854.1|	GO:0009526//plastid envelope	GO:0003824//catalytic activity	-
29736.m002075	-	-	-
29848.m004644	-	-	-
gi|255554411|ref|XM_002518199.1|	-	GO:0016772//transferase activity, transferring phosphorus-containing groups;GO:0032559	GO:0006796//phosphate-containing compound metabolic process
gi|255575842|ref|XM_002528773.1|	GO:0031224//intrinsic to membrane	-	-
29724.m000857	-	-	-
30068.m002671	-	-	-
29816.m000667	-	-	-
30147.m014372	-	-	-
30078.m002309	-	-	-
30169.m006400	-	-	-
29929.m004564	-	-	-
30018.m000549	-	-	-
30199.m000880	-	-	-
29769.m000465	-	-	-
29932.m000605	-	-	-
30078.m002284	-	-	-
30073.m002238	-	-	-
gi|255564143|ref|XM_002523023.1|	-	GO:0046914//transition metal ion binding	-
30128.m008606	-	-	-
30147.m013961	-	-	-
30152.m002411	-	-	-
gi|255567659|ref|XM_002524763.1|	GO:0043231//intracellular membrane-bounded organelle;GO:0030312//external encapsulating structure	GO:0016772//transferase activity, transferring phosphorus-containing groups;GO:0017111//nucleoside-triphosphatase activity;GO:0046914//transition metal ion binding;GO:0008135//translation factor activity, nucleic acid binding;GO:0032561//guanyl ribonucleotide binding;GO:0032559	GO:0006412//translation;GO:0010038//response to metal ion;GO:0009207
29794.m003370	-	-	-
29788.m000328	-	-	-
30078.m002242	-	-	-
28469.m000073	-	-	-
29708.m000193	-	-	-
gi|255567036|ref|XM_002524455.1|	GO:0044464//cell part	GO:0005099//Ras GTPase activator activity	GO:0032318//regulation of Ras GTPase activity
29670.m000146	-	-	-
29908.m006268	-	-	-
29863.m001112	-	-	-
30131.m007112	-	-	-
29642.m000288	-	-	-
30128.m008553	-	-	-
30190.m010928	-	-	-
29794.m003447	-	-	-
gi|255571822|ref|XM_002526808.1|	GO:0019866//organelle inner membrane;GO:0044439;GO:0031224//intrinsic to membrane	-	GO:0006810//transport
29709.m001182	-	-	-
29736.m002073	-	-	-
28842.m000927	-	-	-
28660.m000195	-	-	-
29986.m001623	-	-	-
29736.m002102	-	-	-
29864.m001446	-	-	-
gi|255572907|ref|XM_002527339.1|	GO:0043231//intracellular membrane-bounded organelle	-	-
gi|255560500|ref|XM_002521219.1|	-	GO:0016705//oxidoreductase activity, acting on paired donors, with incorporation or reduction of molecular oxygen	GO:0008152//metabolic process
gi|255562380|ref|XM_002522151.1|	GO:0044424//intracellular part	GO:0016765//transferase activity, transferring alkyl or aryl (other than methyl) groups	GO:0045489//pectin biosynthetic process;GO:0009103//lipopolysaccharide biosynthetic process
29640.m000410	-	-	-
gi|255571397|ref|XM_002526601.1|	GO:0000325//plant-type vacuole	-	GO:0006996//organelle organization;GO:0015031//protein transport
29929.m004532	-	-	-
30221.m002241	-	-	-
29889.m003342	-	-	-
29827.m002670	-	-	-
29989.m000426	-	-	-
gi|255583281|ref|XM_002532359.1|	GO:0043231//intracellular membrane-bounded organelle	-	GO:0006351//transcription, DNA-dependent
28067.m000105	-	-	-
29908.m006018	-	-	-
gi|255550553|ref|XM_002516281.1|	-	GO:0004683//calmodulin-dependent protein kinase activity;GO:0032559	GO:0050896//response to stimulus;GO:0006464//cellular protein modification process
gi|255567063|ref|XM_002524468.1|	GO:0016020//membrane	GO:0004713//protein tyrosine kinase activity;GO:0016628//oxidoreductase activity, acting on the CH-CH group of donors, NAD or NADP as acceptor;GO:0032559	GO:0006464//cellular protein modification process
28492.m000470	-	-	-
29981.m000595	-	-	-
gi|255567787|ref|XM_002524826.1|	-	GO:0070815//peptidyl-lysine 5-dioxygenase activity;GO:0046914//transition metal ion binding;GO:0019842//vitamin binding	GO:0008152//metabolic process
27777.m000273	-	-	-
30073.m002221	-	-	-
gi|255549909|ref|XM_002515960.1|	-	-	-
27744.m000096	-	-	-
28049.m000309	-	-	-
gi|255584707|ref|XM_002533029.1|	-	GO:0004601//peroxidase activity	GO:0008152//metabolic process;GO:0006950//response to stress
Cluster E
Gene	GO Component	GO Function	GO Process
30190.m010964	-	-	-
30128.m008731	-	-	-
30040.m000265	-	-	-
29986.m001605	-	-	-
30054.m000808	-	-	-
gi|255581185|ref|XM_002531360.1|	GO:0016020//membrane;GO:0030312//external encapsulating structure;GO:0043231//intracellular membrane-bounded organelle	GO:0005215//transporter activity	GO:0006810//transport
gi|255546250|ref|XM_002514139.1|	GO:0044424//intracellular part	GO:0046914//transition metal ion binding;GO:0016701//oxidoreductase activity, acting on single donors with incorporation of molecular oxygen	GO:0006020//inositol metabolic process
29830.m001469	-	-	-
gi|255556517|ref|XM_002519247.1|	GO:0031224//intrinsic to membrane	GO:0015301//anion:anion antiporter activity;GO:0015103//inorganic anion transmembrane transporter activity	GO:0006820//anion transport;GO:0010035//response to inorganic substance
30068.m002520	-	-	-
27623.m000142	-	-	-
gi|255564734|ref|XM_002523316.1|	-	-	-
30209.m001509	-	-	-
gi|255569142|ref|XM_002525494.1|	GO:0044464//cell part	-	-
30174.m009093	-	-	-
gi|255556415|ref|XM_002519196.1|	GO:0043234//protein complex	GO:0004721//phosphoprotein phosphatase activity;GO:0043169//cation binding	GO:0006464//cellular protein modification process
gi|255569673|ref|XM_002525756.1|	GO:0044464//cell part	-	-
29272.m000044	-	-	-
gi|255554774|ref|XM_002518379.1|	-	-	-
gi|255563563|ref|XM_002522738.1|	GO:0044464//cell part	-	GO:0051234//establishment of localization
29869.m001140	-	-	-
29222.m000409	-	-	-
29929.m004780	-	-	-
29841.m002826	-	-	-
29863.m001114	-	-	-
30099.m001686	-	-	-
29929.m004676	-	-	-
gi|255560440|ref|XM_002521189.1|	GO:0044444//cytoplasmic part	GO:0031406//carboxylic acid binding;GO:0004713//protein tyrosine kinase activity;GO:0032559	GO:0006464//cellular protein modification process
29813.m001534	-	-	-
34943.m000014	-	-	-
gi|255566404|ref|XM_002524142.1|	GO:0044464//cell part	GO:0005488//binding;GO:0004527//exonuclease activity	GO:0034641//cellular nitrogen compound metabolic process
28837.m000025	-	-	-
gi|255571886|ref|XM_002526840.1|	GO:0009534//chloroplast thylakoid	GO:0004175//endopeptidase activity	GO:0019538//protein metabolic process
gi|255576106|ref|XM_002528902.1|	GO:0031090//organelle membrane;GO:0043231//intracellular membrane-bounded organelle	GO:0005488//binding	-
29588.m000870	-	-	-
gi|255547625|ref|XM_002514824.1|	-	GO:0019120//hydrolase activity, acting on acid halide bonds, in C-halide compounds	-
gi|255553764|ref|XM_002517877.1|	-	-	-
28592.m000283	-	-	-
29648.m001949	-	-	-
gi|255558965|ref|XM_002520460.1|	GO:0043234//protein complex	GO:0004721//phosphoprotein phosphatase activity;GO:0043169//cation binding	GO:0006464//cellular protein modification process
29908.m006247	-	-	-
29912.m005538	-	-	-
gi|255580439|ref|XM_002531000.1|	GO:0031976;GO:0042651//thylakoid membrane	-	GO:0017004//cytochrome complex assembly;GO:0008152//metabolic process;GO:0019725//cellular homeostasis
30115.m001214	-	-	-
gi|255552952|ref|XM_002517473.1|	-	-	-
gi|255561218|ref|XM_002521575.1|	-	-	-
30174.m008720	-	-	-
gi|255577609|ref|XM_002529636.1|	GO:0043231//intracellular membrane-bounded organelle	GO:0046914//transition metal ion binding;GO:0019842//vitamin binding;GO:0019798	GO:0019471
29805.m001495	-	-	-
29999.m000214	-	-	-
27955.m000381	-	-	-
30174.m008666	-	-	-
29717.m000225	-	-	-
gi|255588181|ref|XM_002534479.1|	-	GO:0005488//binding;GO:0016891//endoribonuclease activity, producing 5'-phosphomonoesters	-
Cluster F
Gene	GO Component	GO Function	GO Process
gi|255572316|ref|XM_002527051.1|	GO:0043231//intracellular membrane-bounded organelle	-	-
gi|255572532|ref|XM_002527155.1|	-	GO:0003676//nucleic acid binding	GO:0006351//transcription, DNA-dependent
29842.m003573	-	-	-
30204.m001741	-	-	-
29948.m000693	-	-	-
30193.m000720	-	-	-
gi|255545385|ref|XM_002513707.1|	GO:0012507//ER to Golgi transport vesicle membrane	GO:0046914//transition metal ion binding	GO:0048193//Golgi vesicle transport;GO:0006950//response to stress;GO:0015031//protein transport
gi|255557960|ref|XM_002519963.1|	-	-	-
29772.m000321	-	-	-
29864.m001503	-	-	-
gi|255560126|ref|XM_002521035.1|	GO:0044464//cell part	GO:0016791//phosphatase activity;GO:0043169//cation binding	GO:0032501//multicellular organismal process;GO:0009856//pollination
29683.m000472	-	-	-
30154.m001133	-	-	-
gi|255548158|ref|XM_002515090.1|	-	-	-
gi|255548322|ref|XM_002515172.1|	GO:0044444//cytoplasmic part	GO:0004672//protein kinase activity;GO:0032559	GO:0048507//meristem development;GO:0006464//cellular protein modification process;GO:0006796//phosphate-containing compound metabolic process
gi|255563617|ref|XM_002522765.1|	-	GO:0005488//binding	-
gi|255568769|ref|XM_002525310.1|	GO:0043231//intracellular membrane-bounded organelle	GO:0019783//small conjugating protein-specific protease activity	GO:0070646//protein modification by small protein removal;GO:0006970//response to osmotic stress;GO:0003006//developmental process involved in reproduction
gi|255577565|ref|XM_002529615.1|	GO:0000793//condensed chromosome;GO:0043231//intracellular membrane-bounded organelle	GO:0032559	GO:0007059//chromosome segregation;GO:0006996//organelle organization
gi|255554828|ref|XM_002518406.1|	GO:0031224//intrinsic to membrane	-	-
gi|255538455|ref|XM_002510247.1|	GO:0043231//intracellular membrane-bounded organelle	GO:0003676//nucleic acid binding	GO:0006351//transcription, DNA-dependent
gi|255565322|ref|XM_002523607.1|	GO:0042579//microbody;GO:0031090//organelle membrane	GO:0016628//oxidoreductase activity, acting on the CH-CH group of donors, NAD or NADP as acceptor	GO:0008152//metabolic process
29709.m001170	-	-	-
gi|255550352|ref|XM_002516181.1|	GO:0031410//cytoplasmic vesicle	-	-
gi|255571005|ref|XM_002526408.1|	-	-	-
29801.m003174	-	-	-
30157.m000795	-	-	-
28293.m000037	-	-	-
gi|255545039|ref|XM_002513535.1|	GO:0009536//plastid	GO:0004175//endopeptidase activity;GO:0042623//ATPase activity, coupled;GO:0032559	GO:0009642//response to light intensity;GO:0006950//response to stress;GO:0044257//cellular protein catabolic process
gi|255564799|ref|XM_002523348.1|	GO:0015630//microtubule cytoskeleton;GO:0012505//endomembrane system;GO:0044444//cytoplasmic part;GO:0043231//intracellular membrane-bounded organelle	GO:0005488//binding	-
gi|255546110|ref|XM_002514069.1|	-	GO:0046914//transition metal ion binding	-
gi|255578842|ref|XM_002530230.1|	GO:0043231//intracellular membrane-bounded organelle	GO:0019783//small conjugating protein-specific protease activity;GO:0016790//thiolester hydrolase activity	GO:0019941//modification-dependent protein catabolic process
29729.m002353	-	-	-
30208.m001103	-	-	-
gi|255549061|ref|XM_002515541.1|	-	-	GO:0009987//cellular process
gi|255582801|ref|XM_002532129.1|	GO:0031224//intrinsic to membrane	-	GO:0006810//transport
30170.m013791	-	-	-
30182.m000136	-	-	-
gi|255553222|ref|XM_002517608.1|	GO:0005618//cell wall;GO:0009536//plastid;GO:0030529//ribonucleoprotein complex	GO:0035251//UDP-glucosyltransferase activity	GO:0006073//cellular glucan metabolic process;GO:0048316//seed development;GO:0000377;GO:0005985//sucrose metabolic process;GO:0006950//response to stress
30138.m003886	-	-	-
gi|255549049|ref|XM_002515535.1|	GO:0009536//plastid	GO:0032559	GO:0008152//metabolic process
27704.m000148	-	-	-
gi|255569988|ref|XM_002525911.1|	GO:0044464//cell part	GO:0005099//Ras GTPase activator activity	GO:0032318//regulation of Ras GTPase activity
27985.m000869	-	-	-
29813.m001511	-	-	-
gi|255537028|ref|XM_002509535.1|	GO:0009532//plastid stroma;GO:0009526//plastid envelope;GO:0005576//extracellular region	GO:0017111//nucleoside-triphosphatase activity;GO:0008135//translation factor activity, nucleic acid binding;GO:0032561//guanyl ribonucleotide binding;GO:0032559	GO:0006412//translation;GO:0009207;GO:0009657//plastid organization;GO:0007275//multicellular organismal development
29794.m003497	-	-	-
gi|255587409|ref|XM_002534218.1|	GO:0015630//microtubule cytoskeleton;GO:0044444//cytoplasmic part	GO:0015631//tubulin binding	GO:0000919//cell plate assembly;GO:0015031//protein transport
30147.m014218	-	-	-
gi|255561485|ref|XM_002521707.1|	-	GO:0003824//catalytic activity;GO:0046914//transition metal ion binding	-
gi|255587099|ref|XM_002534090.1|	GO:0044464//cell part	-	-
30170.m013659	-	-	-
30194.m000057	-	-	-
gi|255578470|ref|XM_002530054.1|	GO:0016604//nuclear body;GO:0031461//cullin-RING ubiquitin ligase complex;GO:0030529//ribonucleoprotein complex	GO:0005488//binding;GO:0004468//lysine N-acetyltransferase activity	GO:0000377;GO:0045165//cell fate commitment;GO:0003006//developmental process involved in reproduction
29630.m000797	-	-	-
29667.m000353	-	-	-
gi|255537718|ref|XM_002509880.1|	-	-	-
gi|255557726|ref|XM_002519847.1|	GO:0043231//intracellular membrane-bounded organelle	GO:0005488//binding	GO:0007548//sex differentiation;GO:0006396//RNA processing
gi|255569681|ref|XM_002525760.1|	-	-	-
gi|255572948|ref|XM_002527359.1|	GO:0031224//intrinsic to membrane;GO:0043231//intracellular membrane-bounded organelle;GO:0031090//organelle membrane	GO:0032561//guanyl ribonucleotide binding;GO:0016787//hydrolase activity	GO:0007010//cytoskeleton organization;GO:0009913//epidermal cell differentiation;GO:0048193//Golgi vesicle transport;GO:0009826//unidimensional cell growth;GO:0042546//cell wall biogenesis
gi|255560413|ref|XM_002521176.1|	GO:0009503	-	GO:0009687//abscisic acid metabolic process;GO:0009416//response to light stimulus;GO:0016116//carotenoid metabolic process;GO:0042554//superoxide anion generation
gi|255584431|ref|XM_002532901.1|	GO:0005839//proteasome core complex;GO:0043231//intracellular membrane-bounded organelle	GO:0004175//endopeptidase activity	GO:0019941//modification-dependent protein catabolic process
29842.m003707	-	-	-
30068.m002660	-	-	-
29733.m000742	-	-	-
30131.m006861	-	-	-
30136.m001005	-	-	-
29740.m000495	-	-	-
30190.m011320	-	-	-
gi|255543099|ref|XM_002512567.1|	-	-	-
gi|255576957|ref|XM_002529318.1|	GO:0009534//chloroplast thylakoid	-	-
gi|255583120|ref|XM_002532281.1|	GO:0043231//intracellular membrane-bounded organelle	GO:0003676//nucleic acid binding	-
30078.m002280	-	-	-
gi|255565672|ref|XM_002523780.1|	-	GO:0046872//metal ion binding	-
gi|255586667|ref|XM_002533917.1|	-	-	-
29804.m001501	-	-	-
29842.m003623	-	-	-
gi|255546086|ref|XM_002514057.1|	-	-	GO:0048513//organ development;GO:0009725//response to hormone stimulus;GO:0000160//two-component signal transduction system (phosphorelay)
gi|255554697|ref|XM_002518341.1|	-	GO:0016702//oxidoreductase activity, acting on single donors with incorporation of molecular oxygen, incorporation of two atoms of oxygen	GO:0006558//L-phenylalanine metabolic process;GO:0006570//tyrosine metabolic process
29815.m000501	-	-	-
30147.m014249	-	-	-
30179.m000577	-	-	-
gi|255540412|ref|XM_002511225.1|	-	GO:0003824//catalytic activity	-
gi|255542059|ref|XM_002512048.1|	-	GO:0016741	GO:0006730//one-carbon metabolic process
27766.m000151	-	-	-
gi|255537262|ref|XM_002509652.1|	-	GO:0004674//protein serine/threonine kinase activity;GO:0032559	GO:0006464//cellular protein modification process
gi|255561646|ref|XM_002521787.1|	GO:0015630//microtubule cytoskeleton	GO:0003774//motor activity;GO:0032559	GO:0007017//microtubule-based process
29648.m001929	-	-	-
30078.m002281	-	-	-
gi|255577305|ref|XM_002529488.1|	GO:0043231//intracellular membrane-bounded organelle	GO:0035251//UDP-glucosyltransferase activity	GO:0033554//cellular response to stress;GO:0009812//flavonoid metabolic process;GO:0005975//carbohydrate metabolic process;GO:0002218//activation of innate immune response;GO:0010033//response to organic substance;GO:0006464//cellular protein modification process
gi|255544821|ref|XM_002513426.1|	GO:0009526//plastid envelope;GO:0016020//membrane	-	GO:0003006//developmental process involved in reproduction
gi|255561368|ref|XM_002521649.1|	-	GO:0016843	GO:0008152//metabolic process
gi|255555834|ref|XM_002518907.1|	-	GO:0003824//catalytic activity;GO:0046914//transition metal ion binding	-
gi|255590990|ref|XM_002535366.1|	-	GO:0005488//binding	GO:0006950//response to stress
Cluster G
Gene	GO Component	GO Function	GO Process
29647.m002007	-	-	-
gi|255557557|ref|XM_002519763.1|	GO:0005635//nuclear envelope;GO:0031981//nuclear lumen	GO:0005488//binding	GO:0051234//establishment of localization
30068.m002654	-	-	-
29610.m000411	-	-	-
29666.m001488	-	-	-
gi|255538593|ref|XM_002510316.1|	-	-	-
gi|226958293|gb|GF100462.1|	-	GO:0004091//carboxylesterase activity	-
28623.m000404	-	-	-
29848.m004452	-	-	-
gi|255556891|ref|XM_002519433.1|	GO:0009536//plastid	-	-
gi|255575536|ref|XM_002528623.1|	GO:0043231//intracellular membrane-bounded organelle	GO:0016279//protein-lysine N-methyltransferase activity	GO:0016571//histone methylation;GO:0003006//developmental process involved in reproduction
29830.m001467	-	-	-
30180.m001052	-	-	-
gi|255538981|ref|XM_002510510.1|	GO:0015630//microtubule cytoskeleton	GO:0003774//motor activity;GO:0032559	GO:0007017//microtubule-based process
gi|255539572|ref|XM_002510805.1|	-	GO:0004674//protein serine/threonine kinase activity;GO:0032559	GO:0006464//cellular protein modification process
gi|255550594|ref|XM_002516301.1|	-	-	-
gi|255558365|ref|XM_002520164.1|	-	GO:0016747//transferase activity, transferring acyl groups other than amino-acyl groups	GO:0008152//metabolic process
27383.m000164	-	-	-
30072.m000947	-	-	-
gi|255586619|ref|XM_002533896.1|	-	-	-
30068.m002530	-	-	-
30076.m004465	-	-	-
30131.m007152	-	-	-
30174.m008752	-	-	-
29838.m001724	-	-	-
28752.m000325	-	-	-
27811.m000084	-	-	-
30146.m003553	-	-	-
29762.m000491	-	-	-
29794.m003309	-	-	-
29917.m001937	-	-	-
gi|255564756|ref|XM_002523327.1|	-	GO:0004553//hydrolase activity, hydrolyzing O-glycosyl compounds;GO:0043167//ion binding	GO:0005975//carbohydrate metabolic process
29612.m000381	-	-	-
29780.m001320	-	-	-
gi|255572342|ref|XM_002527064.1|	GO:0015629//actin cytoskeleton	GO:0008092//cytoskeletal protein binding	GO:0007010//cytoskeleton organization
29635.m000455	-	-	-
29969.m000264	-	-	-
29642.m000279	-	-	-
29740.m000489	-	-	-
gi|301341512|gb|HM150785.1|	-	-	-
Cluster H
Gene	GO Component	GO Function	GO Process
30040.m000266	-	-	-
30149.m000231	-	-	-
28301.m000019	-	-	-
29726.m004103	-	-	-
29653.m000298	-	-	-
gi|255539185|ref|XM_002510612.1|	GO:0043231//intracellular membrane-bounded organelle	GO:0005488//binding	-
29634.m002111	-	-	-
29929.m004642	-	-	-
30174.m008641	-	-	-
29930.m000611	-	-	-
29983.m003308	-	-	-
29822.m003384	-	-	-
29970.m001003	-	-	-
30169.m006258	-	-	-
29705.m000598	-	-	-
30008.m000786	-	-	-
30190.m011117	-	-	-
29634.m002150	-	-	-
30221.m002216	-	-	-
29792.m000622	-	-	-
gi|255540052|ref|XM_002511045.1|	-	GO:0005488//binding	-
29792.m000619	-	-	-
29915.m000474	-	-	-
30076.m004633	-	-	-
30068.m002616	-	-	-
30005.m001298	-	-	-
29794.m003451	-	-	-
30190.m011233	-	-	-
30024.m001691	-	-	-
29661.m000930	-	-	-
29681.m001368	-	-	-
29647.m002112	-	-	-
29668.m000320	-	-	-
30174.m008862	-	-	-
gi|255549045|ref|XM_002515533.1|	GO:0044464//cell part	GO:0016289//CoA hydrolase activity;GO:0016836//hydro-lyase activity	GO:0009062//fatty acid catabolic process
29666.m001487	-	-	-
30147.m014276	-	-	-
29637.m000736	-	-	-
29848.m004701	-	-	-
30190.m010771	-	-	-
29827.m002563	-	-	-
27965.m000111	-	-	-
30078.m002333	-	-	-
29661.m000915	-	-	-
29661.m000938	-	-	-
29673.m000917	-	-	-
29813.m001492	-	-	-
30190.m011246	-	-	-
30128.m009041	-	-	-
30138.m003985	-	-	-
29788.m000324	-	-	-
gi|255541073|ref|XM_002511555.1|	GO:0043231//intracellular membrane-bounded organelle	GO:0005488//binding;GO:0003824//catalytic activity	GO:0019941//modification-dependent protein catabolic process;GO:0048528//post-embryonic root development
30128.m008982	-	-	-
30131.m007290	-	-	-
29263.m000092	-	-	-
29279.m000134	-	-	-
29842.m003610	-	-	-
30148.m001442	-	-	-
29739.m003687	-	-	-
gi|255558973|ref|XM_002520464.1|	GO:0005667//transcription factor complex	GO:0008135//translation factor activity, nucleic acid binding	GO:0006351//transcription, DNA-dependent;GO:0006412//translation
29851.m002377	-	-	-
29638.m000527	-	-	-
29705.m000587	-	-	-
gi|255543197|ref|XM_002512616.1|	GO:0016020//membrane;GO:0005798//Golgi-associated vesicle	GO:0046914//transition metal ion binding;GO:0016301//kinase activity;GO:0005083//small GTPase regulator activity;GO:0005543//phospholipid binding;GO:0032559	GO:0003002//regionalization;GO:0032012//regulation of ARF protein signal transduction;GO:0009887//organ morphogenesis;GO:0006464//cellular protein modification process;GO:0009725//response to hormone stimulus
29794.m003422	-	-	-
30078.m002304	-	-	-
27847.m000125	-	-	-
gi|255537346|ref|XM_002509694.1|	GO:0031090//organelle membrane;GO:0043231//intracellular membrane-bounded organelle;GO:0044444//cytoplasmic part	GO:0046914//transition metal ion binding;GO:0019787//small conjugating protein ligase activity	GO:0032446//protein modification by small protein conjugation
30169.m006307	-	-	-
gi|255587596|ref|XM_002534280.1|	GO:0009536//plastid	GO:0046873//metal ion transmembrane transporter activity	GO:0034220//ion transmembrane transport;GO:0030001//metal ion transport
Cluster I
Gene	GO Component	GO Function	GO Process
gi|255542393|ref|XM_002512214.1|	-	-	-
gi|255537412|ref|XM_002509727.1|	-	-	-
gi|255572072|ref|XM_002526931.1|	GO:0009536//plastid	-	GO:0016197//endosomal transport
29794.m003430	-	-	-
30169.m006362	-	-	-
gi|255583178|ref|XM_002532309.1|	GO:0043231//intracellular membrane-bounded organelle	GO:0016836//hydro-lyase activity	GO:0032787//monocarboxylic acid metabolic process
30041.m000234	-	-	-
28211.m000132	-	-	-
30174.m008654	-	-	-
29576.m000225	-	-	-
gi|255565967|ref|XM_002523926.1|	GO:0009536//plastid	GO:0003676//nucleic acid binding;GO:0001071//nucleic acid binding transcription factor activity;GO:0000996	GO:0006351//transcription, DNA-dependent;GO:0009639//response to red or far red light
29950.m001185	-	-	-
gi|255579587|ref|XM_002530589.1|	GO:0043231//intracellular membrane-bounded organelle;GO:0044444//cytoplasmic part;GO:0005576//extracellular region;GO:0016020//membrane	GO:0003729//mRNA binding;GO:0051536//iron-sulfur cluster binding;GO:0046914//transition metal ion binding;GO:0016641//oxidoreductase activity, acting on the CH-NH2 group of donors, oxygen as acceptor;GO:0016836//hydro-lyase activity	GO:0010039//response to iron ion;GO:0009692;GO:0044262//cellular carbohydrate metabolic process;GO:0006970//response to osmotic stress;GO:0072350//tricarboxylic acid metabolic process
30136.m001007	-	-	-
gi|255583645|ref|XM_002532532.1|	-	GO:0019203//carbohydrate phosphatase activity	GO:0005991//trehalose metabolic process
30147.m013928	-	-	-
30147.m014006	-	-	-
gi|255564465|ref|XM_002523183.1|	GO:0009536//plastid	GO:0048037//cofactor binding;GO:0016846//carbon-sulfur lyase activity;GO:0016783//sulfurtransferase activity	GO:0016226//iron-sulfur cluster assembly;GO:0010038//response to metal ion;GO:0000096//sulfur amino acid metabolic process
29791.m000547	-	-	-
29912.m005474	-	-	-
29877.m000482	-	-	-
30169.m006584	-	-	-
gi|255567400|ref|XM_002524634.1|	GO:0044464//cell part	GO:0005488//binding;GO:0070566//adenylyltransferase activity;GO:0016791//phosphatase activity;GO:0016301//kinase activity	GO:0006771//riboflavin metabolic process;GO:0006796//phosphate-containing compound metabolic process
29703.m001488	-	-	-
29662.m000470	-	-	-
gi|255545977|ref|XM_002514003.1|	GO:0031090//organelle membrane;GO:0043231//intracellular membrane-bounded organelle	GO:0046914//transition metal ion binding;GO:0016653//oxidoreductase activity, acting on NAD(P)H, heme protein as acceptor;GO:0000166//nucleotide binding	GO:0008152//metabolic process
30120.m000362	-	-	-
29739.m003645	-	-	-
gi|255570044|ref|XM_002525939.1|	-	-	-
29729.m002273	-	-	-
29999.m000207	-	-	-
gi|255548673|ref|XM_002515347.1|	GO:0044464//cell part	GO:0046914//transition metal ion binding	-
gi|255583807|ref|XM_002532610.1|	GO:0019866//organelle inner membrane;GO:0031224//intrinsic to membrane	-	GO:0006810//transport
30116.m000372	-	-	-
29669.m000808	-	-	-
30190.m011298	-	-	-
29822.m003338	-	-	-
30078.m002261	-	-	-
29912.m005420	-	-	-
gi|315307480|gb|HQ650106.1|	GO:0031981//nuclear lumen	GO:0005488//binding;GO:0034062//RNA polymerase activity	GO:0007154//cell communication;GO:0010033//response to organic substance;GO:0016246//RNA interference
29648.m001963	-	-	-
28653.m000059	-	-	-
29739.m003652	-	-	-
29763.m000197	-	-	-
29830.m001391	-	-	-
gi|255558989|ref|XM_002520472.1|	GO:0005667//transcription factor complex	-	GO:0006352//DNA-dependent transcription, initiation
gi|255577543|ref|XM_002529604.1|	GO:0009536//plastid	GO:0003824//catalytic activity	-
30138.m003955	-	-	-
28802.m000132	-	-	-
gi|255586462|ref|XM_002533829.1|	-	GO:0034062//RNA polymerase activity	GO:0010467//gene expression
gi|448936063|gb|JX997186.1|	GO:0043231//intracellular membrane-bounded organelle	GO:0003677//DNA binding;GO:0016853//isomerase activity	GO:0044260;GO:0090304
